# Supplementary material
Source: PubMed Central journal article supplement (PMC3049731)
Supplement: NIHMS259294-supplement-Supporting_Information.pdf [file NIHMS259294-supplement-Supporting_Information.pdf]

## Supporting Information

### **Anion/ $\pi$ Interactions Revisited: Are There Really Attractive Interactions between Anions and the $\pi$ -Systems of Substituted Benzenes?**

Steven E. Wheeler\* and K. N. Houk\*

*Department of Chemistry and Biochemistry, University of California, Los Angeles, CA 90095*

E-mail: [swheele2@chem.ucla.edu](mailto:swheele2@chem.ucla.edu)

E-mail: [houk@chem.ucla.edu](mailto:houk@chem.ucla.edu)

| <b>Contents</b>                                                              | <b>Page</b> |
|------------------------------------------------------------------------------|-------------|
| Plot of M06-2X/6-31+G(d) interaction energies versus est. CCSD(T)/AVTZ       | S2          |
| Additive interaction energies                                                | S3          |
| Absolute energies, electrostatic potentials, and $Q_{zz}$ quadrupole moments | S4          |
| Optimized Cartesian coordinates                                              | S7          |

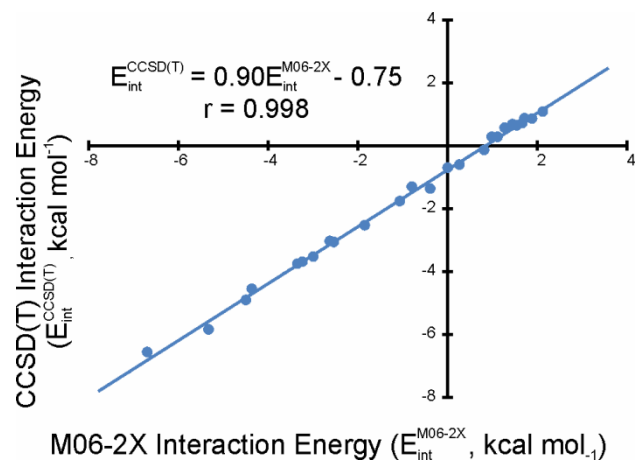

**Figure S1.** Esimated CCSD(T)/AVTZ interaction energies versus M06–2X/6–31+G(d) interaction energies, in kcal mol $^{-1}$ .

**Table S1.** Additive M06-2X/6-31+G(d) interaction energies [ $E_{\text{int}}^{\text{additive}}$ , in kcal mol<sup>-1</sup>. See eq (1) in main text] for Cl<sup>-</sup>...C<sub>6</sub>H<sub>6-n</sub>X<sub>n</sub> complexes. Estimated CCSD(T)/AVTZ//M06-2X/6-31+G(d) additive interaction energies for the monosubstituted systems are provided in parentheses.

|                                  | n           |       |       |       |       |  |
|----------------------------------|-------------|-------|-------|-------|-------|--|
|                                  | 1           | 2     | 3     | 4     | 6     |  |
| H                                | 1.7 (0.9)   |       |       |       |       |  |
| CH <sub>2</sub> OH               | 1.7 (0.7)   | 1.7   | 1.6   |       |       |  |
| NHOH                             | 0.2 (-0.5)  | -2.2  | -3.6  |       |       |  |
| N(CH <sub>3</sub> ) <sub>2</sub> | -0.9 (-1.8) | -4.8  | -6.5  |       |       |  |
| NHCH <sub>3</sub>                | -0.5 (-1.2) | -4.1  | -5.3  |       |       |  |
| OCH <sub>3</sub>                 | -0.5 (-1.0) | -2.9  | -5.5  |       |       |  |
| OH                               | -0.4 (-0.7) | -2.6  | -4.8  |       |       |  |
| CH <sub>3</sub>                  | 1.2 (0.4)   | 0.5   | -0.1  | -0.3  | -1.6  |  |
| NH <sub>2</sub>                  | -0.8 (-1.0) | -4.1  | -5.7  | -0.9  | -4.2  |  |
| SCH <sub>3</sub>                 | 0.1 (-0.3)  | -1.8  | -3.8  |       |       |  |
| SH                               | -0.3 (-0.6) | -2.6  | -5.1  |       |       |  |
| CCH                              | 0.1 (-0.5)  | -1.7  | -3.8  | -6.1  | -11.1 |  |
| SiH <sub>3</sub>                 | 0.5 (-0.5)  | -0.8  | -2.2  |       |       |  |
| F                                | -2.7 (-2.8) | -7.9  | -13.2 | -19.3 | -31.9 |  |
| COOCH <sub>3</sub>               | -0.8 (-1.5) | -3.6  | -6.5  |       |       |  |
| COOH                             | -1.6 (-2.3) | -5.2  | -9.0  |       |       |  |
| COCH <sub>3</sub>                | -2.0 (-2.6) | -6.0  | -10.2 |       |       |  |
| OCF <sub>3</sub>                 | -4.5 (-4.7) | -11.6 | -19.1 |       |       |  |
| BF <sub>2</sub>                  | -2.3 (-2.7) | -6.3  | -10.5 |       |       |  |
| CHO                              | -2.5 (-2.9) | -7.0  | -11.7 |       |       |  |
| CF <sub>3</sub>                  | -3.9 (-4.2) | -10.2 | -16.8 |       |       |  |
| NO                               | -3.8 (-3.8) | -10.0 | -16.7 |       |       |  |
| SiF <sub>3</sub>                 | -4.0 (-4.3) | -9.8  | -15.6 |       |       |  |
| CN                               | -6.3 (-6.7) | -13.2 | -25.0 | -30.0 | -56.8 |  |
| NO <sub>2</sub>                  | -7.1 (-6.9) | -18.7 | -27.6 |       |       |  |

**Table S2.** Absolute energies (hartree) for C<sub>6</sub>H<sub>5</sub>X and Cl<sup>-</sup>⋯C<sub>6</sub>H<sub>5</sub>X, ESP (kcal mol<sup>-1</sup>), and Q<sub>zz</sub> component of the arene quadrupole moment (Buckingham).

|                                  | C <sub>6</sub> H <sub>5</sub> X | Cl <sup>-</sup> ⋯C <sub>6</sub> H <sub>5</sub> X | ESP  | Q <sub>zz</sub> |
|----------------------------------|---------------------------------|--------------------------------------------------|------|-----------------|
| H                                | -232.144420                     | -692.377006                                      | -6.9 | -8.6            |
| BF <sub>2</sub>                  | -456.161696                     | -916.401788                                      | -3.3 | -3.3            |
| CCH                              | -308.266166                     | -768.501475                                      | -6.8 | -11.5           |
| CF <sub>3</sub>                  | -569.101316                     | -1029.341964                                     | -3.1 | -8.2            |
| CH <sub>2</sub> OH               | -346.626584                     | -806.858523                                      | -8.1 | -11.4           |
| CH <sub>3</sub>                  | -271.441420                     | -731.674965                                      | -7.3 | -8.2            |
| CHO                              | -345.431563                     | -805.672042                                      | -3.2 | -3.8            |
| CN                               | -324.362323                     | -784.606131                                      | -1.2 | -1.8            |
| COCH <sub>3</sub>                | -384.734790                     | -844.974148                                      | -4.4 | -5.0            |
| COOCH <sub>3</sub>               | -459.946137                     | -920.183162                                      | -5.6 | -8.9            |
| COOH                             | -420.662289                     | -880.900556                                      | -4.6 | -7.7            |
| F                                | -331.357687                     | -791.594270                                      | -4.9 | -6.2            |
| N(CH <sub>3</sub> ) <sub>2</sub> | -366.052394                     | -826.285067                                      | -8.4 | -11.0           |
| NH <sub>2</sub>                  | -287.479896                     | -747.713646                                      | -6.8 | -11.5           |
| NHCH <sub>3</sub>                | -326.766511                     | -786.999366                                      | -7.5 | -11.4           |
| NHOH                             | -362.617436                     | -822.849760                                      | -7.9 | -10.6           |
| NO                               | -361.396213                     | -821.638488                                      | -2.1 | -3.2            |
| NO <sub>2</sub>                  | -436.579762                     | -896.825744                                      | 0.1  | -2.0            |
| OCF <sub>3</sub>                 | -644.297749                     | -1104.537256                                     | -4.0 | -8.2            |
| OH                               | -307.341603                     | -767.574898                                      | -7.2 | -9.0            |
| OCH <sub>3</sub>                 | -346.625421                     | -806.858432                                      | -7.8 | -9.4            |
| SCH <sub>3</sub>                 | -669.591880                     | -1129.825902                                     | -7.6 | -10.7           |
| SH                               | -630.296401                     | -1090.531306                                     | -6.9 | -10.2           |
| SiF <sub>3</sub>                 | -820.662272                     | -1280.904758                                     | -2.3 | -8.6            |
| SiH <sub>3</sub>                 | -522.790737                     | -983.026668                                      | -6.4 | -7.8            |

**Table S3.** Absolute energies (hartree) for C<sub>6</sub>H<sub>4</sub>X<sub>2</sub> and Cl<sup>-</sup>⋯C<sub>6</sub>H<sub>4</sub>X<sub>2</sub>, ESP (kcal mol<sup>-1</sup>), and Q<sub>zz</sub> component of the arene quadrupole moment (Buckingham).

|                                  | C <sub>6</sub> H <sub>4</sub> X <sub>2</sub> | Cl <sup>-</sup> ⋯C <sub>6</sub> H <sub>4</sub> X <sub>2</sub> | ESP  | Q <sub>zz</sub> |
|----------------------------------|----------------------------------------------|---------------------------------------------------------------|------|-----------------|
| BF <sub>2</sub>                  | -680.17658                                   | -1140.42398                                                   | 0.6  | 7.4             |
| CCH                              | -384.38769                                   | -844.625452                                                   | -6.2 | -13.8           |
| CF <sub>3</sub>                  | -906.05542                                   | -1366.30433                                                   | 1.5  | 0.4             |
| CH <sub>2</sub> OH               | -461.10845                                   | -921.339783                                                   | -9.4 | -16.9           |
| CH <sub>3</sub>                  | -310.73819                                   | -770.972945                                                   | -7.3 | -8.0            |
| CHO                              | -458.7163                                    | -918.964376                                                   | 0.9  | 4.5             |
| CN                               | -416.57597                                   | -876.831116                                                   | 5.4  | 11.2            |
| COCH <sub>3</sub>                | -537.32361                                   | -997.569386                                                   | -1.3 | 2.7             |
| COOCH <sub>3</sub>               | -687.74631                                   | -1147.98731                                                   | -4.1 | -7.3            |
| COOH                             | -609.17812                                   | -1069.42169                                                   | -2.1 | -4.3            |
| F                                | -430.56863                                   | -890.809612                                                   | -2.4 | -2.2            |
| N(CH <sub>3</sub> ) <sub>2</sub> | -499.95663                                   | -960.191489                                                   | -9.1 | -16.6           |
| NH <sub>2</sub>                  | -342.81132                                   | -803.047598                                                   | -5.9 | -14.3           |
| NHCH <sub>3</sub>                | -421.38443                                   | -881.619656                                                   | -7.7 | -15.5           |
| NHOH                             | -493.08838                                   | -953.321696                                                   | -8.5 | -12.5           |
| NO                               | -490.64419                                   | -950.89598                                                    | 3.4  | 6.9             |
| NO <sub>2</sub>                  | -641.00859                                   | -1101.26808                                                   | 8.4  | 14.0            |
| OCF <sub>3</sub>                 | -1056.4483                                   | -1516.69493                                                   | -0.3 | 0.1             |
| OH                               | -382.53552                                   | -842.769809                                                   | -6.9 | -9.0            |
| OCH <sub>3</sub>                 | -461.10386                                   | -921.337712                                                   | -7.8 | -10.2           |
| SCH <sub>3</sub>                 | -1107.0388                                   | -1567.27438                                                   | -8.2 | -11.9           |
| SH                               | -1028.4475                                   | -1488.6849                                                    | -6.4 | -10.1           |
| SiF <sub>3</sub>                 | -1409.1772                                   | -1869.42903                                                   | 2.9  | 2.3             |
| SiH <sub>3</sub>                 | -813.43695                                   | -1273.67615                                                   | -5.7 | -5.8            |

**Table S4.** Absolute energies (hartree) for  $C_6H_3X_3$  and  $Cl^- \cdots C_6H_3X_3$ , ESP (kcal mol<sup>-1</sup>), and  $Q_{zz}$  component of the arene quadrupole moment (Buckinghams).

|                                  | $C_6H_3X_3$ | $Cl^- \cdots C_6H_3X_3$ | ESP   | $Q_{zz}$ |
|----------------------------------|-------------|-------------------------|-------|----------|
| BF <sub>2</sub>                  | -904.19296  | -1364.44805             | 5.1   | 15.0     |
| CCH                              | -460.50724  | -920.74736              | -5.6  | -17.0    |
| CF <sub>3</sub>                  | -1243.0069  | -1703.26401             | 6.2   | 4.1      |
| CH <sub>2</sub> OH               | -575.59206  | -1035.82291             | -10.8 | -19.7    |
| CH <sub>3</sub>                  | -350.03535  | -810.271348             | -7.5  | -7.6     |
| CHO                              | -572.00168  | -1032.25763             | 5.3   | 11.4     |
| CN                               | -508.78473  | -969.051429             | 12.2  | 19.8     |
| COCH <sub>3</sub>                | -689.9151   | -1150.16745             | 1.9   | 7.4      |
| COOCH <sub>3</sub>               | -915.54645  | -1375.79165             | -2.3  | -8.4     |
| COOH                             | -797.69337  | -1257.94249             | 0.8   | -3.0     |
| F                                | -529.78035  | -990.025709             | 0.3   | 0.6      |
| N(CH <sub>3</sub> ) <sub>2</sub> | -633.86733  | -1094.10108             | -11.0 | -21.0    |
| NH <sub>2</sub>                  | -398.15155  | -858.387304             | -6.6  | -18.9    |
| NHCH <sub>3</sub>                | -516.01153  | -976.245282             | -9.2  | -20.7    |
| NHOH                             | -623.56576  | -1083.7979              | -10.2 | -15.9    |
| NO                               | -619.88981  | -1080.15183             | 9.6   | 14.0     |
| NO <sub>2</sub>                  | -845.432    | -1305.70551             | 16.7  | 23.8     |
| OCF <sub>3</sub>                 | -1468.5984  | -1928.85128             | 2.9   | 3.5      |
| OH                               | -457.73783  | -917.972437             | -7.0  | -9.9     |
| OCH <sub>3</sub>                 | -575.5893   | -1035.82306             | -9.0  | -12.6    |
| SCH <sub>3</sub>                 | -1544.4875  | -2004.72394             | -9.1  | -15.6    |
| SH                               | -1426.5998  | -1886.83905             | -6.5  | -11.8    |
| SiF <sub>3</sub>                 | -1997.6908  | -2457.95183             | 7.9   | 6.4      |
| SiH <sub>3</sub>                 | -1104.0836  | -1564.32601             | -4.7  | -4.6     |

**Table S5.** Absolute energies (hartree) for  $C_6H_2X_4$  and  $Cl^- \cdots C_6H_2X_4$ , ESP (kcal mol<sup>-1</sup>), and  $Q_{zz}$  component of the arene quadrupole moment (Buckinghams).

|                 | $C_6H_2X_4$ | $Cl^- \cdots C_6H_2X_4$ | ESP   | $Q_{zz}$ |
|-----------------|-------------|-------------------------|-------|----------|
| CCH             | -536.62689  | -996.867697             | -5.8  | -21.4    |
| CH <sub>3</sub> | -389.33365  | -849.56917              | -8.0  | -7.2     |
| CN              | -600.98727  | -1061.26282             | 17.8  | 26.0     |
| F               | -628.97592  | -1089.22589             | 3.3   | 3.7      |
| NH <sub>2</sub> | -453.48441  | -913.714989             | -10.5 | -15.2    |

**Table S6.** Absolute energies (hartree) for  $C_6H_2X_4$  and  $Cl^- \cdots C_6H_2X_4$ , ESP (kcal mol<sup>-1</sup>), and  $Q_{zz}$  component of the arene quadrupole moment (Buckinghams).

|                 | $C_6H_2X_4$ | $Cl^- \cdots C_6H_2X_4$ | ESP   | $Q_{zz}$ |
|-----------------|-------------|-------------------------|-------|----------|
| CCH             | -688.86251  | -1149.10463             | -6.3  | -30.6    |
| CH <sub>3</sub> | -467.91471  | -928.151546             | -8.6  | -6.3     |
| CN              | -785.38471  | -1245.67727             | 28.2  | 37.1     |
| F               | -827.36665  | -1287.62609             | 9.4   | 9.1      |
| NH <sub>2</sub> | -564.1445   | -1024.37741             | -10.5 | -13.3    |

### Optimized Cartesian coordinates (Angstrom)

15  
**Cl<sup>-</sup>C6H5BF2**

|    |             |             |             |
|----|-------------|-------------|-------------|
| C  | 1.75532853  | 1.73197405  | 0.00000000  |
| C  | 1.42924486  | 1.12006945  | -1.20980600 |
| C  | 1.42924486  | 1.12006945  | 1.20980600  |
| C  | 0.44076362  | -0.73484162 | 0.00000000  |
| C  | 0.77499601  | -0.10764574 | 1.20800000  |
| C  | 0.77499601  | -0.10764574 | -1.20800000 |
| H  | 0.51983257  | -0.58646667 | -2.14609300 |
| H  | 1.68459783  | 1.59924603  | -2.14674300 |
| H  | 1.68459783  | 1.59924603  | 2.14674300  |
| H  | 0.51983257  | -0.58646667 | 2.14609300  |
| F  | -0.61521130 | -2.71640639 | -1.13455100 |
| F  | -0.61521130 | -2.71640639 | 1.13455100  |
| B  | -0.28617421 | -2.09895961 | 0.00000000  |
| H  | 2.26486768  | 2.68813770  | 0.00000000  |
| Cl | -1.98802926 | 2.14967868  | 0.00000000  |

15  
**Cl<sup>-</sup>C6H5CCH**

|    |             |             |             |
|----|-------------|-------------|-------------|
| C  | 0.14866529  | -1.13567711 | 0.00000000  |
| C  | 0.59785875  | -0.59208852 | 1.21067500  |
| C  | 0.59785875  | -0.59208852 | -1.21067500 |
| C  | 1.92819742  | 1.01781230  | 0.00000000  |
| C  | 1.48356489  | 0.47974309  | -1.20665700 |
| C  | 1.48356489  | 0.47974309  | 1.20665700  |
| H  | 0.24756991  | -1.01598832 | -2.14301400 |
| H  | 0.24756991  | -1.01598832 | 2.14301400  |
| H  | 1.82707094  | 0.89543474  | -2.14584400 |
| H  | 1.82707094  | 0.89543474  | 2.14584400  |
| C  | -0.76571418 | -2.24220757 | 0.00000000  |
| C  | -1.53505487 | -3.17322026 | 0.00000000  |
| H  | -2.21389743 | -3.99471724 | 0.00000000  |
| H  | 2.61813337  | 1.85273386  | 0.00000000  |
| Cl | -1.65806843 | 2.17241127  | 0.00000000  |

16  
**Cl<sup>-</sup>C6H5CF3**

|   |             |             |             |
|---|-------------|-------------|-------------|
| C | 1.84892313  | 1.87204269  | 0.00000000  |
| C | 1.49041732  | 1.27666931  | -1.20768600 |
| C | 1.49041732  | 1.27666931  | 1.20768600  |
| C | 0.41703644  | -0.50385216 | 0.00000000  |
| C | 0.77256965  | 0.08434931  | 1.21154400  |
| C | 0.77256965  | 0.08434931  | -1.21154400 |
| H | 1.76585897  | 1.74061530  | 2.14615600  |
| H | 1.76585897  | 1.74061530  | -2.14615600 |
| C | -0.30997113 | -1.81498253 | 0.00000000  |

|    |             |             |             |
|----|-------------|-------------|-------------|
| F  | -1.09530787 | -1.95958059 | 1.08558200  |
| F  | 0.54493122  | -2.86217007 | 0.00000000  |
| F  | -1.09530787 | -1.95958059 | -1.08558200 |
| H  | 0.48561118  | -0.38229525 | 2.14479900  |
| H  | 0.48561118  | -0.38229525 | -2.14479900 |
| H  | 2.40527413  | 2.80105635  | 0.00000000  |
| Cl | -1.82287224 | 2.46251843  | 0.00000000  |

17  
**Cl<sup>-</sup>C6H5CH2OH**

|    |             |             |             |
|----|-------------|-------------|-------------|
| C  | 2.07498866  | 0.85069420  | 0.36722796  |
| C  | 1.37687149  | 0.18784761  | 1.37218163  |
| C  | 1.79781194  | 0.56196599  | -0.96899143 |
| C  | 0.12656584  | -1.05016384 | -0.28239641 |
| C  | 0.82900143  | -0.38315264 | -1.28919568 |
| C  | 0.40492278  | -0.76032826 | 1.05122581  |
| H  | 2.33542171  | 1.07217952  | -1.75884046 |
| H  | 1.58689303  | 0.40702504  | 2.41203038  |
| C  | -0.91715051 | -2.06897470 | -0.66933402 |
| H  | -1.68121393 | -1.58368104 | -1.28670411 |
| H  | -0.44585378 | -2.85635887 | -1.26796099 |
| H  | 0.61609511  | -0.60514872 | -2.33029789 |
| H  | -0.14045772 | -1.27827877 | 1.82789508  |
| H  | 2.82875247  | 1.58607786  | 0.61994527  |
| O  | -1.50154308 | -2.61899399 | 0.50111891  |
| H  | -2.16621751 | -3.26792332 | 0.24685653  |
| Cl | -1.47524379 | 2.55592530  | 0.00257752  |

16  
**Cl<sup>-</sup>C6H5CH3**

|    |             |             |             |
|----|-------------|-------------|-------------|
| C  | 1.95672908  | -0.34588745 | 0.00722630  |
| C  | 1.29660089  | -0.58050064 | -1.19692758 |
| C  | 1.28066163  | -0.54438671 | 1.20903010  |
| C  | -0.71867938 | -1.20809740 | 0.00244455  |
| C  | -0.04474061 | -0.97323453 | 1.20351284  |
| C  | -0.02884342 | -1.00925309 | -1.19610025 |
| H  | 1.78567676  | -0.36984697 | 2.15155539  |
| H  | 1.81409162  | -0.43422743 | -2.13749494 |
| C  | -2.16414024 | -1.64010549 | -0.00064780 |
| H  | -2.40250391 | -2.22212720 | 0.89100220  |
| H  | -2.82750335 | -0.77103408 | -0.01808728 |
| H  | -2.39078767 | -2.24867296 | -0.87750589 |
| H  | -0.56386510 | -1.12919542 | 2.14322292  |
| H  | -0.53550561 | -1.19345018 | -2.13749995 |
| H  | 2.98848503  | -0.01625978 | 0.00911422  |
| Cl | -0.43138915 | 2.71727094  | -0.01150210 |

15  
**Cl<sup>-</sup>-C6H5CHO**

|    |             |             |             |
|----|-------------|-------------|-------------|
| C  | 0.15583924  | -1.07049228 | -0.21795767 |
| C  | 0.44438413  | -0.70585365 | 1.10047099  |
| C  | 0.74027879  | -0.38517539 | -1.28364717 |
| C  | 1.90300118  | 1.03071503  | 0.27813642  |
| C  | 1.61632073  | 0.66836869  | -1.03625064 |
| C  | 1.31818437  | 0.34497676  | 1.34598764  |
| H  | 0.50808966  | -0.67799466 | -2.30235388 |
| H  | -0.02369556 | -1.25538616 | 1.90769072  |
| H  | 2.07208980  | 1.20290757  | -1.86018376 |
| H  | 1.54726496  | 0.63406153  | 2.36408868  |
| C  | -0.77370352 | -2.18860967 | -0.49675816 |
| O  | -1.33051406 | -2.84384090 | 0.35631371  |
| H  | -0.94134820 | -2.40480137 | -1.56703487 |
| H  | 2.58415899  | 1.84993465  | 0.47377846  |
| Cl | -1.61931039 | 2.19049580  | -0.00037550 |

14  
**Cl<sup>-</sup>-C6H5CN**

|    |             |             |             |
|----|-------------|-------------|-------------|
| C  | 1.84571519  | 1.09569317  | 0.00000000  |
| C  | 1.42786852  | 0.54151975  | 1.20898600  |
| C  | 1.42786852  | 0.54151975  | -1.20898600 |
| C  | 0.17410573  | -1.12129591 | 0.00000000  |
| C  | 0.59092292  | -0.56848788 | -1.21523800 |
| C  | 0.59092292  | -0.56848788 | 1.21523800  |
| C  | -0.69270356 | -2.27091057 | 0.00000000  |
| N  | -1.38877854 | -3.19408711 | 0.00000000  |
| H  | 1.75356182  | 0.97347382  | 2.14648100  |
| H  | 1.75356182  | 0.97347382  | -2.14648100 |
| H  | 0.25855056  | -1.00930010 | -2.14582200 |
| H  | 0.25855056  | -1.00930010 | 2.14582200  |
| H  | 2.49762136  | 1.96029037  | 0.00000000  |
| Cl | -1.70521163 | 2.03368643  | 0.00000000  |

18  
**Cl<sup>-</sup>-C6H5COCH3**

|   |             |             |             |
|---|-------------|-------------|-------------|
| C | 0.39789800  | -0.75716013 | 0.04046105  |
| C | 0.77900471  | -0.12734319 | 1.22959218  |
| C | 0.72329836  | -0.17102259 | -1.18564277 |
| C | 1.79929701  | 1.65479616  | -0.03463136 |
| C | 1.42278426  | 1.03285430  | -1.22254447 |
| C | 1.47666015  | 1.07339272  | 1.19235220  |
| H | 0.43558543  | -0.64581436 | -2.11499101 |
| H | 0.51720725  | -0.59788426 | 2.16833417  |
| H | 1.67243346  | 1.48280205  | -2.17523427 |
| H | 1.76973951  | 1.55754816  | 2.11550713  |
| C | -0.35292200 | -2.05051254 | 0.13219038  |
| O | -0.62066721 | -2.53440424 | 1.21551428  |
| C | -0.77079165 | -2.74163264 | -1.14622736 |

|    |             |             |             |
|----|-------------|-------------|-------------|
| H  | 0.10226040  | -2.98390937 | -1.75648875 |
| H  | -1.42452927 | -2.09621486 | -1.73732792 |
| H  | -1.29896068 | -3.65569133 | -0.88518053 |
| H  | 2.34320953  | 2.59092780  | -0.06380032 |
| Cl | -1.88252829 | 2.18489632  | 0.04069224  |

19  
**Cl<sup>-</sup>-C6H5COOCH3**

|    |             |             |             |
|----|-------------|-------------|-------------|
| C  | 0.59674790  | -0.32088136 | -0.10436719 |
| C  | 0.95705802  | 0.45296982  | -1.20906731 |
| C  | 0.74294706  | 0.18486202  | 1.18896362  |
| C  | 1.61091606  | 2.24087835  | 0.27029209  |
| C  | 1.25088127  | 1.46745606  | 1.37267247  |
| C  | 1.46402322  | 1.73369271  | -1.02047985 |
| H  | 0.46060491  | -0.42344420 | 2.03727103  |
| H  | 0.83314403  | 0.03589437  | -2.20010164 |
| H  | 1.36561302  | 1.86287071  | 2.37424104  |
| H  | 1.74408272  | 2.33553207  | -1.87599705 |
| C  | 0.05919973  | -1.68515169 | -0.36143493 |
| O  | -0.08538194 | -2.16583755 | -1.46368779 |
| O  | -0.25539817 | -2.34279665 | 0.76685947  |
| C  | -0.77840789 | -3.66414427 | 0.57146638  |
| H  | -0.97634580 | -4.04635091 | 1.56809340  |
| H  | -1.69263425 | -3.61915351 | -0.01738360 |
| H  | -0.04567600 | -4.28183394 | 0.05557710  |
| H  | 2.00595053  | 3.23879762  | 0.41689551  |
| Cl | -2.14051121 | 2.26521597  | -0.06072005 |

16  
**Cl<sup>-</sup>-C6H5COOH**

|    |             |             |             |
|----|-------------|-------------|-------------|
| C  | 1.83680023  | 1.58949871  | -0.02020145 |
| C  | 1.46193854  | 0.98177759  | -1.21735953 |
| C  | 1.48589767  | 1.01405178  | 1.20098345  |
| C  | 0.38460458  | -0.77791861 | 0.02559085  |
| C  | 0.75928051  | -0.17050829 | 1.22559928  |
| C  | 0.73440441  | -0.20426119 | -1.19848780 |
| H  | 1.73579032  | 1.43084928  | -2.16353329 |
| H  | 1.77836653  | 1.48821515  | 2.12913831  |
| H  | 0.43789892  | -0.68502197 | -2.12053333 |
| H  | 0.47382283  | -0.63846238 | 2.15861265  |
| C  | -0.39043897 | -2.04156538 | 0.10179143  |
| O  | -0.72421256 | -2.58854289 | 1.12804333  |
| O  | -0.70340340 | -2.54834355 | -1.11015770 |
| H  | -1.20361132 | -3.36420746 | -0.94875720 |
| H  | 2.40297840  | 2.51250219  | -0.03845590 |
| Cl | -1.87289646 | 2.23557465  | 0.00782038  |



|                            |             |             |             |
|----------------------------|-------------|-------------|-------------|
| 13                         |             |             |             |
| <b>Cl<sup>-</sup>C6H5F</b> |             |             |             |
| C                          | 0.68644763  | 1.18781778  | 0.00000000  |
| C                          | 0.06074714  | 0.97313410  | 1.21658000  |
| C                          | 0.06074714  | 0.97313410  | -1.21658000 |
| C                          | -1.91775662 | 0.29429098  | 0.00000000  |
| C                          | -1.25708627 | 0.52097314  | -1.20644900 |
| C                          | -1.25708627 | 0.52097314  | 1.20644900  |
| F                          | 1.96689448  | 1.62715105  | 0.00000000  |
| H                          | 0.59983218  | 1.15809921  | 2.13600000  |
| H                          | 0.59983218  | 1.15809921  | -2.13600000 |
| H                          | -1.76715665 | 0.34596323  | -2.14537100 |
| H                          | -1.76715665 | 0.34596323  | 2.14537100  |
| H                          | -2.94136591 | -0.05691893 | 0.00000000  |
| Cl                         | 0.54811106  | -2.61279440 | 0.00000000  |

|                           |             |             |             |
|---------------------------|-------------|-------------|-------------|
| 13                        |             |             |             |
| <b>Cl<sup>-</sup>C6H6</b> |             |             |             |
| C                         | -0.98556382 | 0.98556382  | 1.08050847  |
| C                         | -1.34630522 | -0.36074140 | 1.08050847  |
| C                         | 0.36074140  | 1.34630522  | 1.08050847  |
| C                         | 0.98556382  | -0.98556382 | 1.08050847  |
| C                         | 1.34630522  | 0.36074140  | 1.08050847  |
| C                         | -0.36074140 | -1.34630522 | 1.08050847  |
| H                         | -1.75154749 | 1.75154749  | 1.08050847  |
| H                         | -2.39265837 | -0.64111088 | 1.08050847  |
| H                         | -0.64111088 | -2.39265837 | 1.08050847  |
| H                         | 1.75154749  | -1.75154749 | 1.08050847  |
| H                         | 2.39265837  | 0.64111088  | 1.08050847  |
| H                         | 0.64111088  | 2.39265837  | 1.08050847  |
| Cl                        | 0.00000000  | 0.00000000  | -2.66949153 |

|                                 |             |             |             |
|---------------------------------|-------------|-------------|-------------|
| 21                              |             |             |             |
| <b>Cl<sup>-</sup>C6H5NCH3_2</b> |             |             |             |
| C                               | 0.42933225  | -0.84621748 | 0.00000000  |
| C                               | 0.84155937  | -0.24240876 | 1.20480800  |
| C                               | 0.84155937  | -0.24240876 | -1.20480800 |
| C                               | 2.06440253  | 1.47001125  | 0.00000000  |
| C                               | 1.64797040  | 0.89041203  | -1.19537800 |
| C                               | 1.64797040  | 0.89041203  | 1.19537800  |
| H                               | 0.53856359  | -0.65352489 | 2.15666650  |
| H                               | 1.94805706  | 1.32462824  | 2.14181049  |
| H                               | 1.94805706  | 1.32462824  | -2.14181049 |
| H                               | 0.53856359  | -0.65352489 | -2.15666650 |
| N                               | -0.34587239 | -1.99919219 | 0.00000000  |
| C                               | -1.00725621 | -2.37416484 | -1.23492797 |
| H                               | -1.59310683 | -3.27409960 | -1.05913546 |
| H                               | -0.27409087 | -2.60632470 | -2.00861246 |
| H                               | -1.67461421 | -1.58672541 | -1.61084497 |
| C                               | -1.00725621 | -2.37416484 | 1.23492797  |

|    |             |             |            |
|----|-------------|-------------|------------|
| H  | -0.27409087 | -2.60632470 | 2.00861246 |
| H  | -1.59310683 | -3.27409960 | 1.05913546 |
| H  | -1.67461421 | -1.58672541 | 1.61084497 |
| H  | 2.68968142  | 2.35335094  | 0.00000000 |
| Cl | -1.81811080 | 2.48260373  | 0.00000000 |

|                              |             |             |             |
|------------------------------|-------------|-------------|-------------|
| 15                           |             |             |             |
| <b>Cl<sup>-</sup>C6H5NH2</b> |             |             |             |
| C                            | 0.77905109  | 1.18973755  | 0.00000000  |
| C                            | 0.08868170  | 1.01102680  | -1.20529550 |
| C                            | 0.08868170  | 1.01102680  | 1.20529550  |
| C                            | -1.94197058 | 0.47749163  | 0.00000000  |
| C                            | -1.25632578 | 0.65796805  | 1.19985750  |
| C                            | -1.25632578 | 0.65796805  | -1.19985750 |
| H                            | 0.60973140  | 1.15637048  | 2.14520650  |
| H                            | -1.77067190 | 0.52160613  | 2.14355150  |
| H                            | -1.77067190 | 0.52160613  | -2.14355150 |
| H                            | 0.60973140  | 1.15637048  | -2.14520650 |
| H                            | 2.63086284  | 1.36299740  | 0.83449000  |
| H                            | 2.63086284  | 1.36299740  | -0.83449000 |
| N                            | 2.11516628  | 1.59662962  | 0.00000000  |
| H                            | -2.98829671 | 0.20109575  | 0.00000000  |
| Cl                           | 0.36656082  | -2.79357438 | 0.00000000  |

|                                |             |             |             |
|--------------------------------|-------------|-------------|-------------|
| 18                             |             |             |             |
| <b>Cl<sup>-</sup>C6H5NHCH3</b> |             |             |             |
| C                              | 0.07369107  | -1.11398630 | -0.26625791 |
| C                              | 0.39744505  | -0.81078496 | 1.06364885  |
| C                              | 0.81915782  | -0.50791417 | -1.29282924 |
| C                              | 2.17795062  | 0.66415889  | 0.32997728  |
| C                              | 1.85241247  | 0.36763138  | -0.99541060 |
| C                              | 1.44287810  | 0.06695143  | 1.34796944  |
| H                              | 0.58359462  | -0.74047146 | -2.32601503 |
| H                              | 2.41054238  | 0.82168484  | -1.80557487 |
| H                              | 1.67690939  | 0.28452906  | 2.38337851  |
| H                              | -0.15806009 | -1.25698114 | 1.87750484  |
| N                              | -0.93285734 | -2.01296809 | -0.59148683 |
| H                              | -1.29981071 | -1.89878207 | -1.52211661 |
| C                              | -1.90351938 | -2.42153476 | 0.40232171  |
| H                              | -2.66043212 | -3.03425557 | -0.08440116 |
| H                              | -1.42429275 | -3.03283350 | 1.16915196  |
| H                              | -2.39506984 | -1.57108969 | 0.89130790  |
| H                              | 2.98579587  | 1.34681078  | 0.55953420  |
| Cl                             | -1.31466294 | 2.68853155  | -0.03169877 |

|                 |            |            |             |
|-----------------|------------|------------|-------------|
| 16              |            |            |             |
| <b>C6H5NHOH</b> |            |            |             |
| C               | 2.09235245 | 0.79690317 | -0.34736119 |
| C               | 1.80076603 | 0.48432733 | 0.98082083  |
| C               | 1.38845837 | 0.15812857 | -1.36354922 |

|    |             |             |             |
|----|-------------|-------------|-------------|
| C  | 0.11957216  | -1.09102245 | 0.25764935  |
| C  | 0.40276549  | -0.78389919 | -1.07218688 |
| C  | 0.82328520  | -0.45410143 | 1.28585229  |
| H  | 0.60942708  | -0.70513921 | 2.31924095  |
| H  | 2.33813806  | 0.97228203  | 1.78499669  |
| H  | 1.60020727  | 0.39479213  | -2.39939607 |
| H  | -0.15410273 | -1.26637553 | -1.86216596 |
| N  | -0.81841261 | -2.08798313 | 0.61922437  |
| H  | -1.38262198 | -1.78374642 | 1.40392858  |
| O  | -1.72534225 | -2.37206259 | -0.41941948 |
| H  | -1.59207406 | -3.31256427 | -0.59173002 |
| H  | 2.85486490  | 1.52823955  | -0.58315630 |
| Cl | -1.44149473 | 2.53546343  | 0.02951273  |

15  
**Cl<sup>-</sup>C6H5NO2**

|    |             |             |             |
|----|-------------|-------------|-------------|
| C  | 0.36672165  | -0.76696376 | 0.00000000  |
| C  | 0.70145779  | -0.19276922 | -1.21951500 |
| C  | 0.70145779  | -0.19276922 | 1.21951500  |
| C  | 1.75088051  | 1.60737341  | 0.00000000  |
| C  | 1.40191015  | 1.00876198  | -1.21000200 |
| C  | 1.40191015  | 1.00876198  | 1.21000200  |
| H  | 1.67450837  | 1.47636733  | -2.14716400 |
| H  | 0.41660010  | -0.68140403 | -2.13988900 |
| H  | 0.41660010  | -0.68140403 | 2.13988900  |
| H  | 1.67450837  | 1.47636733  | 2.14716400  |
| O  | -0.65784217 | -2.52446432 | -1.07799600 |
| O  | -0.65784217 | -2.52446432 | 1.07799600  |
| N  | -0.37396506 | -2.03751155 | 0.00000000  |
| H  | 2.29609055  | 2.54260743  | 0.00000000  |
| Cl | -1.84006503 | 2.09924146  | 0.00000000  |

14  
**Cl<sup>-</sup>C6H5NO**

|    |             |             |             |
|----|-------------|-------------|-------------|
| C  | 0.10884775  | -1.07943027 | -0.21809534 |
| C  | 0.69985954  | -0.42319115 | -1.29458896 |
| C  | 0.39854781  | -0.72899733 | 1.10278891  |
| C  | 1.89873662  | 0.96618827  | 0.26175201  |
| C  | 1.29910125  | 0.30009887  | 1.33628072  |
| C  | 1.60245121  | 0.60837186  | -1.05172077 |
| H  | -0.08191382 | -1.26351867 | 1.91150532  |
| H  | 0.44079594  | -0.73382004 | -2.29935404 |
| H  | 1.53938469  | 0.58950590  | 2.35153421  |
| H  | 2.07105998  | 1.12914186  | -1.87679257 |
| N  | -0.80885798 | -2.12998648 | -0.57555069 |
| O  | -1.31831572 | -2.69556071 | 0.35947267  |
| H  | 2.60044394  | 1.76822409  | 0.45452119  |
| Cl | -1.55332377 | 2.18391862  | -0.01216706 |

17  
**Cl<sup>-</sup>C6H5OCF3**

|    |             |             |             |
|----|-------------|-------------|-------------|
| C  | 0.62359471  | -0.02863721 | -0.36837246 |
| C  | 0.97537665  | 0.88347597  | -1.35589192 |
| C  | 0.74355457  | 0.27412134  | 0.98183885  |
| C  | 1.59046323  | 2.46137930  | 0.36477576  |
| C  | 1.23199417  | 1.53210191  | 1.33552351  |
| C  | 1.45997752  | 2.13146466  | -0.98354273 |
| H  | 0.47004060  | -0.43505004 | 1.74847578  |
| H  | 0.86386361  | 0.60097250  | -2.39433841 |
| H  | 1.32928945  | 1.77788113  | 2.38533826  |
| H  | 1.73525211  | 2.84517390  | -1.74959345 |
| C  | -0.23058552 | -2.23323554 | -0.03936390 |
| O  | 0.15039621  | -1.24660026 | -0.86670682 |
| F  | -1.24967947 | -1.87462492 | 0.76263758  |
| F  | 0.76652872  | -2.65638513 | 0.75880154  |
| F  | -0.63054685 | -3.26111294 | -0.78274968 |
| H  | 1.96791145  | 3.43342030  | 0.65445314  |
| Cl | -2.11250003 | 2.45620520  | 0.00184186  |

14  
**Cl<sup>-</sup>C6H5OH**

|    |             |             |             |
|----|-------------|-------------|-------------|
| C  | -0.74384370 | -1.17735055 | 0.00385504  |
| C  | -0.08229756 | -0.97881413 | 1.21475627  |
| C  | -0.07854419 | -0.97711602 | -1.20411983 |
| C  | 1.92722654  | -0.37458482 | 0.00659157  |
| C  | 1.25612787  | -0.57599413 | -1.19597944 |
| C  | 1.24880223  | -0.57876253 | 1.20879299  |
| H  | -0.59810646 | -1.13304431 | -2.14406849 |
| H  | 1.76820089  | -0.42187314 | -2.13798518 |
| H  | 1.76008879  | -0.42532205 | 2.15135218  |
| H  | -0.62316131 | -1.14158350 | 2.13801051  |
| O  | -2.05151197 | -1.57037244 | 0.06253135  |
| H  | -2.40322817 | -1.67586732 | -0.82976234 |
| H  | 2.96375363  | -0.06306639 | 0.00896951  |
| Cl | -0.44825169 | 2.67055702  | 0.00646196  |

17  
**Cl<sup>-</sup>C6H5OMe**

|   |             |             |             |
|---|-------------|-------------|-------------|
| C | 0.09749778  | -1.05068782 | -0.25839041 |
| C | 0.40035395  | -0.73164230 | 1.06548857  |
| C | 0.77014912  | -0.41063389 | -1.30476023 |
| C | 2.05138921  | 0.87032082  | 0.29638097  |
| C | 1.73859450  | 0.54158950  | -1.02534844 |
| C | 1.37896354  | 0.23025903  | 1.32945527  |
| H | -0.10680268 | -1.21362148 | 1.88931465  |
| H | 1.60955803  | 0.47356077  | 2.35959427  |
| H | 2.25367703  | 1.03143362  | -1.84271265 |
| H | 0.51354473  | -0.67915011 | -2.32148331 |
| O | -0.83612280 | -1.97044667 | -0.63109018 |

|    |             |             |             |
|----|-------------|-------------|-------------|
| C  | -1.54273660 | -2.64407469 | 0.39498328  |
| H  | -2.11089675 | -1.93868837 | 1.00664674  |
| H  | -0.86069410 | -3.21663753 | 1.02862185  |
| H  | -2.22621804 | -3.32139254 | -0.10956341 |
| H  | 2.80770519  | 1.61392893  | 0.51231247  |
| Cl | -1.44448000 | 2.48137389  | -0.02710960 |

17

**Cl<sup>-</sup>C<sub>6</sub>H<sub>5</sub>SCH<sub>3</sub>**

|    |             |             |             |
|----|-------------|-------------|-------------|
| C  | 0.42469192  | -0.71853951 | -0.21503155 |
| C  | 0.65347120  | -0.29877317 | 1.09669639  |
| C  | 0.93404513  | 0.04289563  | -1.27559626 |
| C  | 1.88676719  | 1.62131645  | 0.28615022  |
| C  | 1.65760372  | 1.20097913  | -1.02470080 |
| C  | 1.38184285  | 0.86655882  | 1.33879857  |
| H  | 0.27329711  | -0.86502664 | 1.93590855  |
| H  | 1.55133171  | 1.17977816  | 2.36207700  |
| H  | 2.04413618  | 1.77764330  | -1.85633024 |
| H  | 0.75948243  | -0.27825731 | -2.29632784 |
| S  | -0.48171293 | -2.17484703 | -0.65744107 |
| C  | -0.95369047 | -2.85318389 | 0.95131907  |
| H  | -1.59192620 | -2.16324385 | 1.50270478  |
| H  | -0.07855994 | -3.11777286 | 1.54421666  |
| H  | -1.51894329 | -3.75877567 | 0.73501788  |
| H  | 2.45110877  | 2.52452711  | 0.48092032  |
| Cl | -1.88770053 | 2.37242115  | -0.04911435 |

14

**Cl<sup>-</sup>C<sub>6</sub>H<sub>5</sub>SH**

|    |             |             |             |
|----|-------------|-------------|-------------|
| C  | 0.09483756  | -1.06884109 | -0.00945885 |
| C  | 0.56989404  | -0.56921703 | 1.20624284  |
| C  | 0.58729567  | -0.54929701 | -1.20809075 |
| C  | 2.02089550  | 0.96004603  | 0.02292578  |
| C  | 1.54603887  | 0.46062861  | -1.18685318 |
| C  | 1.52753731  | 0.43955628  | 1.21779632  |
| H  | 0.22705867  | -0.92814578 | -2.15716563 |
| H  | 1.92023226  | 0.85542018  | -2.12339638 |
| H  | 1.88837164  | 0.81903503  | 2.16574018  |
| H  | 0.19076603  | -0.96920436 | 2.13917185  |
| S  | -1.12650800 | -2.35544556 | 0.05083148  |
| H  | -1.26019570 | -2.49539869 | -1.27610664 |
| H  | 2.76599848  | 1.74492908  | 0.03514089  |
| Cl | -1.51688806 | 2.38960228  | 0.00870230  |

16

**Cl<sup>-</sup>C<sub>6</sub>H<sub>5</sub>SiF<sub>3</sub>**

|   |            |             |             |
|---|------------|-------------|-------------|
| C | 0.55514067 | -0.16946221 | 0.00000000  |
| C | 0.84215853 | 0.47931338  | 1.20869900  |
| C | 0.84215853 | 0.47931338  | -1.20869900 |
| C | 1.70186932 | 2.37973421  | 0.00000000  |

|    |             |             |             |
|----|-------------|-------------|-------------|
| C  | 1.41472297  | 1.74770436  | -1.20842900 |
| C  | 1.41472297  | 1.74770436  | 1.20842900  |
| Si | -0.17909343 | -1.84642320 | 0.00000000  |
| F  | 0.90477973  | -3.02051410 | 0.00000000  |
| F  | -1.07592372 | -2.07742793 | 1.30156500  |
| F  | -1.07592372 | -2.07742793 | -1.30156500 |
| H  | 0.61197020  | -0.00231194 | -2.15222700 |
| H  | 0.61197020  | -0.00231194 | 2.15222700  |
| H  | 1.63229804  | 2.24272421  | -2.14632000 |
| H  | 1.63229804  | 2.24272421  | 2.14632000  |
| H  | 2.14611935  | 3.36734824  | 0.00000000  |
| Cl | -1.97225743 | 2.50554335  | 0.00000000  |

16

**Cl<sup>-</sup>C<sub>6</sub>H<sub>5</sub>SiH<sub>3</sub>**

|    |             |             |             |
|----|-------------|-------------|-------------|
| C  | 0.16478306  | -1.04432016 | -0.00078791 |
| C  | 0.64396011  | -0.50755304 | 1.20145508  |
| C  | 0.63524078  | -0.50118959 | -1.20365280 |
| C  | 2.00942390  | 1.07593021  | -0.00189012 |
| C  | 1.54819550  | 0.55119029  | -1.20733163 |
| C  | 1.55697751  | 0.54482858  | 1.20405218  |
| Si | -1.08885016 | -2.44045606 | 0.00004710  |
| H  | -2.48425980 | -1.91922946 | -0.00120013 |
| H  | -0.90647492 | -3.27497098 | 1.21905001  |
| H  | -0.90581777 | -3.27784159 | -1.21690264 |
| H  | 0.29074030  | -0.90421811 | -2.15019676 |
| H  | 0.30631033  | -0.91559988 | 2.14830260  |
| H  | 1.90141631  | 0.95753299  | -2.14730436 |
| H  | 1.91703778  | 0.94618734  | 2.14356994  |
| H  | 2.72115731  | 1.89243669  | -0.00232827 |
| Cl | -1.58515838 | 2.34992766  | 0.00325186  |

|                                                                              |             |             |             |
|------------------------------------------------------------------------------|-------------|-------------|-------------|
| 17                                                                           |             |             |             |
| <b>Cl<sup>-</sup>C<sub>6</sub>H<sub>4</sub> (BF<sub>2</sub>)<sub>2</sub></b> |             |             |             |
| C                                                                            | 0.69500700  | 1.20965400  | 0.55338278  |
| C                                                                            | -0.69500700 | 1.20965400  | 0.55338278  |
| C                                                                            | -0.69500700 | -1.20965400 | 0.55338278  |
| C                                                                            | 0.69500700  | -1.20965400 | 0.55338278  |
| C                                                                            | 1.40221200  | 0.00000000  | 0.55317978  |
| C                                                                            | -1.40221200 | 0.00000000  | 0.55317978  |
| H                                                                            | 1.23828400  | 2.14683700  | 0.55314578  |
| H                                                                            | -1.23828400 | 2.14683700  | 0.55314578  |
| H                                                                            | -1.23828400 | -2.14683700 | 0.55314578  |
| H                                                                            | 1.23828400  | -2.14683700 | 0.55314578  |
| F                                                                            | -3.64749100 | 1.13532100  | 0.55236678  |
| F                                                                            | -3.64749100 | -1.13532100 | 0.55236678  |
| F                                                                            | 3.64749100  | 1.13532100  | 0.55236678  |
| F                                                                            | 3.64749100  | -1.13532100 | 0.55236678  |
| B                                                                            | -2.95365200 | 0.00000000  | 0.55265178  |
| B                                                                            | 2.95365200  | 0.00000000  | 0.55265178  |
| Cl                                                                           | 0.00000000  | 0.00000000  | -2.79668522 |

|                                                                   |             |             |             |
|-------------------------------------------------------------------|-------------|-------------|-------------|
| 17                                                                |             |             |             |
| <b>Cl<sup>-</sup>C<sub>6</sub>H<sub>4</sub> (CCH)<sub>2</sub></b> |             |             |             |
| C                                                                 | -1.40053000 | 0.00000000  | -0.69638554 |
| C                                                                 | -0.69346500 | 1.21011600  | -0.69638554 |
| C                                                                 | -0.69346500 | -1.21011600 | -0.69638554 |
| C                                                                 | 1.40053000  | 0.00000000  | -0.69638554 |
| C                                                                 | 0.69346500  | -1.21011600 | -0.69638554 |
| C                                                                 | 0.69346500  | 1.21011600  | -0.69638554 |
| H                                                                 | -1.24069100 | -2.14358900 | -0.69638554 |
| H                                                                 | -1.24069100 | 2.14358900  | -0.69638554 |
| H                                                                 | 1.24069100  | -2.14358900 | -0.69638554 |
| H                                                                 | 1.24069100  | 2.14358900  | -0.69638554 |
| C                                                                 | -2.83454200 | 0.00000000  | -0.69638554 |
| C                                                                 | -4.04230000 | 0.00000000  | -0.69638554 |
| H                                                                 | -5.10788400 | 0.00000000  | -0.69638554 |
| C                                                                 | 2.83454200  | 0.00000000  | -0.69638554 |
| C                                                                 | 4.04230000  | 0.00000000  | -0.69638554 |
| H                                                                 | 5.10788400  | 0.00000000  | -0.69638554 |
| Cl                                                                | 0.00000000  | 0.00000000  | 2.70361446  |

|                                                                              |             |             |            |
|------------------------------------------------------------------------------|-------------|-------------|------------|
| 19                                                                           |             |             |            |
| <b>Cl<sup>-</sup>C<sub>6</sub>H<sub>4</sub> (CF<sub>3</sub>)<sub>2</sub></b> |             |             |            |
| C                                                                            | -0.69508904 | -1.21182567 | 0.42024826 |
| C                                                                            | 0.69508904  | -1.21182567 | 0.42024826 |
| C                                                                            | 1.38072824  | 0.00000000  | 0.41944801 |
| C                                                                            | 0.69508904  | 1.21182567  | 0.42024826 |
| C                                                                            | -0.69508904 | 1.21182567  | 0.42024826 |
| C                                                                            | -1.38072824 | 0.00000000  | 0.41944801 |
| H                                                                            | -1.24124175 | -2.14563430 | 0.41144976 |
| H                                                                            | 1.24124175  | -2.14563430 | 0.41144976 |

|    |             |             |             |
|----|-------------|-------------|-------------|
| H  | 1.24124175  | 2.14563430  | 0.41144976  |
| H  | -1.24124175 | 2.14563430  | 0.41144976  |
| C  | -2.88197481 | 0.00000000  | 0.46837051  |
| C  | 2.88197481  | 0.00000000  | 0.46837051  |
| F  | -3.33392977 | 0.00000000  | 1.73991503  |
| F  | -3.40436510 | -1.08550806 | -0.13177050 |
| F  | -3.40436510 | 1.08550806  | -0.13177050 |
| F  | 3.33392977  | 0.00000000  | 1.73991503  |
| F  | 3.40436510  | -1.08550806 | -0.13177050 |
| F  | 3.40436510  | 1.08550806  | -0.13177050 |
| Cl | 0.00000000  | 0.00000000  | -2.88001836 |

|                                                                                |             |             |             |
|--------------------------------------------------------------------------------|-------------|-------------|-------------|
| 21                                                                             |             |             |             |
| <b>Cl<sup>-</sup>C<sub>6</sub>H<sub>4</sub> (CH<sub>2</sub>OH)<sub>2</sub></b> |             |             |             |
| C                                                                              | -0.64949419 | -0.30408648 | 1.40450600  |
| C                                                                              | -0.79632085 | 0.88481091  | 0.69844650  |
| C                                                                              | -0.50190417 | -1.49916492 | 0.69395650  |
| C                                                                              | -0.64949419 | -0.30408648 | -1.40450600 |
| C                                                                              | -0.50190417 | -1.49916492 | -0.69395650 |
| C                                                                              | -0.79632085 | 0.88481091  | -0.69844650 |
| H                                                                              | -0.91076016 | 1.81145863  | 1.24405400  |
| H                                                                              | -0.91076016 | 1.81145863  | -1.24405400 |
| H                                                                              | -0.38622957 | -2.43581515 | -1.23078000 |
| H                                                                              | -0.38622957 | -2.43581515 | 1.23078000  |
| C                                                                              | -0.64493966 | -0.34096581 | 2.91270950  |
| H                                                                              | -1.45851390 | -0.98765608 | 3.25986950  |
| H                                                                              | 0.30152103  | -0.77029497 | 3.25986950  |
| C                                                                              | -0.64493966 | -0.34096581 | -2.91270950 |
| H                                                                              | 0.30152103  | -0.77029497 | -3.25986950 |
| H                                                                              | -1.45851390 | -0.98765608 | -3.25986950 |
| O                                                                              | -0.80738191 | 0.97437549  | 3.42081100  |
| H                                                                              | -0.80354998 | 0.94334721  | 4.38325300  |
| O                                                                              | -0.80738191 | 0.97437549  | -3.42081100 |
| H                                                                              | -0.80354998 | 0.94334721  | -4.38325300 |
| Cl                                                                             | 2.97324013  | 0.14122285  | 0.00000000  |

|                                                                              |             |             |            |
|------------------------------------------------------------------------------|-------------|-------------|------------|
| 19                                                                           |             |             |            |
| <b>Cl<sup>-</sup>C<sub>6</sub>H<sub>4</sub> (CH<sub>3</sub>)<sub>2</sub></b> |             |             |            |
| C                                                                            | 1.41661200  | 0.00000000  | 0.82166316 |
| C                                                                            | 0.69624750  | -1.19608200 | 0.82563516 |
| C                                                                            | 0.69624750  | 1.19608200  | 0.82563516 |
| C                                                                            | -1.41661200 | 0.00000000  | 0.82166316 |
| C                                                                            | -0.69624750 | 1.19608200  | 0.82563516 |
| C                                                                            | -0.69624750 | -1.19608200 | 0.82563516 |
| H                                                                            | 1.23122825  | -2.14002550 | 0.83458991 |
| H                                                                            | -1.23122825 | -2.14002550 | 0.83458991 |
| H                                                                            | -1.23122825 | 2.14002550  | 0.83458991 |
| H                                                                            | 1.23122825  | 2.14002550  | 0.83458991 |
| C                                                                            | 2.92486750  | 0.00000000  | 0.79144266 |
| H                                                                            | 3.32808075  | 0.88415550  | 1.28809416 |

|                                      |             |             |             |                                       |             |             |             |
|--------------------------------------|-------------|-------------|-------------|---------------------------------------|-------------|-------------|-------------|
| H                                    | 3.29306700  | 0.00000000  | -0.23826984 | C                                     | 0.56422799  | 1.14549121  | -0.69612400 |
| H                                    | 3.32808075  | -0.88415550 | 1.28809416  | C                                     | 0.55233081  | -0.06176317 | 1.39756000  |
| C                                    | -2.92486750 | 0.00000000  | 0.79144266  | C                                     | 0.56422799  | 1.14549121  | 0.69612400  |
| H                                    | 3.29306700  | 0.00000000  | -0.23826984 | C                                     | 0.54041400  | -1.27100945 | 0.69297850  |
| H                                    | -3.32808075 | 0.88415550  | 1.28809416  | H                                     | 0.57353709  | 2.09012334  | -1.22454200 |
| H                                    | -3.32808075 | -0.88415550 | 1.28809416  | H                                     | 0.53129947  | -2.19589754 | -1.25465700 |
| C1                                   | 0.00000000  | 0.00000000  | -2.77568884 | H                                     | 0.57353709  | 2.09012334  | 1.22454200  |
|                                      |             |             |             | H                                     | 0.53129947  | -2.19589754 | 1.25465700  |
| 17                                   |             |             |             | C                                     | 0.55182444  | -0.11314667 | 2.89832500  |
| <b>C1<sup>13</sup>C6H4 (CHO) 2</b>   |             |             |             | O                                     | 0.54127930  | -1.18320472 | 3.47391700  |
| C                                    | -0.62454674 | -0.22475460 | -1.38483900 | C                                     | 0.55182444  | -0.11314667 | -2.89832500 |
| C                                    | -0.75340879 | 0.98586649  | -0.69245200 | O                                     | 0.54127930  | -1.18320472 | -3.47391700 |
| C                                    | -0.49624006 | -1.43015817 | -0.69581200 | C                                     | 0.56462123  | 1.18539527  | -3.67119200 |
| C                                    | -0.62454674 | -0.22475460 | 1.38483900  | H                                     | -0.31293983 | 1.78833726  | -3.42615200 |
| C                                    | -0.49624006 | -1.43015817 | 0.69581200  | H                                     | 1.45389438  | 1.77092557  | -3.42615200 |
| C                                    | -0.75340879 | 0.98586649  | 0.69245200  | H                                     | 0.56232489  | 0.95237659  | -4.73347900 |
| H                                    | -0.39733659 | -2.35932721 | -1.24647000 | C                                     | 0.56462123  | 1.18539527  | 3.67119200  |
| H                                    | -0.85101195 | 1.90281953  | -1.25985100 | H                                     | 1.45389438  | 1.77092557  | 3.42615200  |
| H                                    | -0.39733659 | -2.35932721 | 1.24647000  | H                                     | -0.31293983 | 1.78833726  | 3.42615200  |
| H                                    | -0.85101195 | 1.90281953  | 1.25985100  | H                                     | 0.56232489  | 0.95237659  | 4.73347900  |
| C                                    | -0.62331396 | -0.23633618 | 2.86968300  | C1                                    | -2.79751308 | -0.02941536 | 0.00000000  |
| O                                    | -0.72893584 | 0.75595030  | 3.55340800  |                                       |             |             |             |
| H                                    | -0.51731973 | -1.23212090 | 3.33428600  | 25                                    |             |             |             |
| C                                    | -0.62331396 | -0.23633618 | -2.86968300 | <b>C1<sup>13</sup>C6H4 (COOCH3) 2</b> |             |             |             |
| O                                    | -0.72893584 | 0.75595030  | -3.55340800 | C                                     | -0.44847038 | 0.24647586  | -1.38733600 |
| H                                    | -0.51731973 | -1.23212090 | -3.33428600 | C                                     | -0.44847038 | 0.24647586  | 1.38733600  |
| C1                                   | 2.65673085  | 0.12627305  | 0.00000000  | C                                     | -0.27874127 | 1.44635277  | -0.69398200 |
|                                      |             |             |             | C                                     | -0.61831252 | -0.95420009 | -0.69502700 |
| 15                                   |             |             |             | C                                     | -0.61831252 | -0.95420009 | 0.69502700  |
| <b>C1<sup>13</sup>C6H4 (CN) 2</b>    |             |             |             | C                                     | -0.27874127 | 1.44635277  | 0.69398200  |
| C                                    | 1.38416400  | 0.00000000  | -0.66569953 | H                                     | -0.74876206 | -1.87639539 | -1.24420100 |
| C                                    | 0.69363700  | -1.21638300 | -0.66631853 | H                                     | -0.14925059 | 2.36176955  | -1.25636400 |
| C                                    | 0.69363700  | 1.21638300  | -0.66631853 | H                                     | -0.74876206 | -1.87639539 | 1.24420100  |
| C                                    | -1.38416400 | 0.00000000  | -0.66569953 | H                                     | -0.14925059 | 2.36176955  | 1.25636400  |
| C                                    | -0.69363700 | 1.21638300  | -0.66631853 | C                                     | -0.44065385 | 0.30173376  | 2.87785300  |
| C                                    | -0.69363700 | -1.21638300 | -0.66631853 | C                                     | -0.44065385 | 0.30173376  | -2.87785300 |
| C                                    | 2.82381900  | 0.00000000  | -0.66491153 | O                                     | -0.29683310 | 1.31845503  | 3.51854700  |
| C                                    | -2.82381900 | 0.00000000  | -0.66491153 | O                                     | -0.29683310 | 1.31845503  | -3.51854700 |
| N                                    | 3.97947200  | 0.00000000  | -0.66400653 | O                                     | -0.61102655 | -0.90269285 | 3.44332400  |
| N                                    | -3.97947200 | 0.00000000  | -0.66400653 | O                                     | -0.61102655 | -0.90269285 | -3.44332400 |
| H                                    | 1.24420500  | -2.14732900 | -0.66775453 | C                                     | -0.61105932 | -0.90292455 | 4.87894300  |
| H                                    | 1.24420500  | 2.14732900  | -0.66775453 | C                                     | -0.61105932 | -0.90292455 | -4.87894300 |
| H                                    | -1.24420500 | 2.14732900  | -0.66775453 | H                                     | -0.75765832 | -1.93928629 | 5.16693500  |
| H                                    | -1.24420500 | -2.14732900 | -0.66775453 | H                                     | -0.75765832 | -1.93928629 | -5.16693500 |
| C1                                   | 0.00000000  | 0.00000000  | 2.58388747  | H                                     | 0.33996299  | -0.52515403 | 5.24996700  |
|                                      |             |             |             | H                                     | -1.41999021 | -0.27619909 | -5.24996700 |
| 23                                   |             |             |             | H                                     | -1.41999021 | -0.27619909 | 5.24996700  |
| <b>C1<sup>13</sup>C6H4 (COCH3) 2</b> |             |             |             | H                                     | 0.33996299  | -0.52515403 | -5.24996700 |
| C                                    | 0.55233081  | -0.06176317 | -1.39756000 | C1                                    | 2.86847053  | -0.22299514 | 0.00000000  |
| C                                    | 0.54041400  | -1.27100945 | -0.69297850 |                                       |             |             |             |

19  
**C1<sup>-</sup>C6H4 (COOH) 2**

|    |             |             |             |
|----|-------------|-------------|-------------|
| C  | -0.55237862 | -0.03855806 | 1.38503700  |
| C  | -0.55237862 | -0.03855806 | -1.38503700 |
| C  | -0.53346304 | -1.25169260 | 0.69370300  |
| C  | -0.57130000 | 1.17494844  | 0.69506500  |
| C  | -0.57130000 | 1.17494844  | -0.69506500 |
| C  | -0.53346304 | -1.25169260 | -0.69370300 |
| H  | -0.58582144 | 2.10626823  | 1.24400200  |
| H  | -0.51905508 | -2.17573428 | 1.25637300  |
| H  | -0.58582144 | 2.10626823  | -1.24400200 |
| H  | -0.51905508 | -2.17573428 | -1.25637300 |
| C  | -0.55157908 | -0.08983582 | -2.87245100 |
| C  | -0.55157908 | -0.08983582 | 2.87245100  |
| O  | -0.53571680 | -1.10714917 | -3.52476600 |
| O  | -0.53571680 | -1.10714917 | 3.52476600  |
| O  | -0.57061610 | 1.13108677  | -3.44420800 |
| O  | -0.57061610 | 1.13108677  | 3.44420800  |
| H  | -0.56844033 | 0.99154573  | -4.40491300 |
| H  | -0.56844033 | 0.99154573  | 4.40491300  |
| C1 | 2.79721229  | 0.01379385  | 0.00000000  |

13  
**C1<sup>-</sup>C6H4F2**

|    |             |             |             |
|----|-------------|-------------|-------------|
| C  | -1.36050000 | 0.00000000  | -0.77066667 |
| C  | -0.69646100 | 1.21571600  | -0.77066667 |
| C  | -0.69646100 | -1.21571600 | -0.77066667 |
| C  | 1.36050000  | 0.00000000  | -0.77066667 |
| C  | 0.69646100  | -1.21571600 | -0.77066667 |
| C  | 0.69646100  | 1.21571600  | -0.77066667 |
| F  | -2.71324800 | 0.00000000  | -0.77066667 |
| F  | 2.71324800  | 0.00000000  | -0.77066667 |
| H  | -1.26320000 | 2.13689900  | -0.77066667 |
| H  | -1.26320000 | -2.13689900 | -0.77066667 |
| H  | 1.26320000  | -2.13689900 | -0.77066667 |
| H  | 1.26320000  | 2.13689900  | -0.77066667 |
| C1 | 0.00000000  | 0.00000000  | 2.62933333  |

29  
**C1<sup>-</sup>C6H4 (NCH3\_2) 2**

|   |            |             |             |
|---|------------|-------------|-------------|
| C | 0.68757935 | -1.19306886 | -0.69535200 |
| C | 0.68757935 | -1.19306886 | 0.69535200  |
| C | 0.71272603 | -0.00126285 | 1.43630800  |
| C | 0.70028910 | 1.19081337  | 0.69527700  |
| C | 0.70028910 | 1.19081337  | -0.69527700 |
| C | 0.71272603 | -0.00126285 | -1.43630800 |
| H | 0.66493267 | -2.15106869 | -1.19494900 |
| H | 0.66493267 | -2.15106869 | 1.19494900  |
| H | 0.68822600 | 2.14897264  | 1.19495400  |
| H | 0.68822600 | 2.14897264  | -1.19495400 |

|    |             |             |             |
|----|-------------|-------------|-------------|
| N  | 0.75942214  | -0.00123214 | -2.83766800 |
| N  | 0.75942214  | -0.00123214 | 2.83766800  |
| C  | 0.35589018  | 1.22317045  | -3.50274800 |
| H  | 0.40415153  | 1.06867336  | -4.57947600 |
| H  | 1.04207492  | 2.03505281  | -3.26002400 |
| H  | -0.66445914 | 1.53496773  | -3.23494100 |
| C  | 0.35589018  | 1.22317045  | 3.50274800  |
| H  | 1.04207492  | 2.03505281  | 3.26002400  |
| H  | 0.40415153  | 1.06867336  | 4.57947600  |
| H  | -0.66445914 | 1.53496773  | 3.23494100  |
| C  | 0.35243617  | -1.22431819 | -3.50285400 |
| H  | 1.03534153  | -2.03847863 | -3.25841400 |
| H  | 0.40303287  | -1.07047872 | -4.57956600 |
| H  | -0.66950716 | -1.53239912 | -3.23669500 |
| C  | 0.35243617  | -1.22431819 | 3.50285400  |
| H  | 0.40303287  | -1.07047872 | 4.57956600  |
| H  | 1.03534153  | -2.03847863 | 3.25841400  |
| H  | -0.66950716 | -1.53239912 | 3.23669500  |
| C1 | -2.94979684 | 0.00486825  | 0.00000000  |

17  
**C1<sup>-</sup>C6H4 (NH2) 2**

|    |             |             |             |
|----|-------------|-------------|-------------|
| C  | 1.19711000  | 0.69536100  | 0.84692267  |
| C  | 1.19711000  | -0.69536100 | 0.84692267  |
| C  | -1.19711000 | -0.69536100 | 0.84692267  |
| C  | -1.19711000 | 0.69536100  | 0.84692267  |
| C  | 0.00000000  | 1.41573000  | 0.84277667  |
| C  | 0.00000000  | -1.41573000 | 0.84277667  |
| H  | 2.14210500  | 1.22750900  | 0.85802867  |
| H  | 2.14210500  | -1.22750900 | 0.85802867  |
| H  | -2.14210500 | 1.22750900  | 0.85802867  |
| H  | -2.14210500 | -1.22750900 | 0.85802867  |
| H  | 0.82907400  | -3.24493100 | 0.51079367  |
| H  | -0.82907400 | -3.24493100 | 0.51079367  |
| H  | 0.82907400  | 3.24493100  | 0.51079367  |
| H  | -0.82907400 | 3.24493100  | 0.51079367  |
| N  | 0.00000000  | -2.82161700 | 0.90078967  |
| N  | 0.00000000  | 2.82161700  | 0.90078967  |
| C1 | 0.00000000  | 0.00000000  | -2.85445933 |

23  
**C1<sup>-</sup>C6H4 (NHCH3) 2**

|   |             |             |             |
|---|-------------|-------------|-------------|
| C | -0.72133510 | 0.27765854  | 1.42059600  |
| C | -0.63016292 | 1.47550492  | 0.69123800  |
| C | -0.80872406 | -0.91286853 | 0.69957400  |
| C | -0.63016292 | 1.47550492  | -0.69123800 |
| C | -0.80872406 | -0.91286853 | -0.69957400 |
| C | -0.72133510 | 0.27765854  | -1.42059600 |
| H | -0.57337580 | 2.41844444  | -1.22473100 |
| H | -0.57337580 | 2.41844444  | 1.22473100  |

|                                     |             |             |             |                                     |             |             |             |
|-------------------------------------|-------------|-------------|-------------|-------------------------------------|-------------|-------------|-------------|
| H                                   | -0.87709512 | -1.86181313 | 1.21439300  | O                                   | 1.07907900  | -0.52815534 | 3.38817400  |
| H                                   | -0.87709512 | -1.86181313 | -1.21439300 | O                                   | -1.07907900 | -0.52815534 | 3.38817400  |
| N                                   | -0.76265659 | 0.32317590  | -2.82006400 | O                                   | 1.07907900  | -0.52815534 | -3.38817400 |
| H                                   | -0.26775787 | 1.11660428  | -3.19677400 | O                                   | -1.07907900 | -0.52815534 | -3.38817400 |
| N                                   | -0.76265659 | 0.32317590  | 2.82006400  | N                                   | 0.00000000  | -0.52815534 | 2.83087100  |
| H                                   | -0.26775787 | 1.11660428  | 3.19677400  | N                                   | 0.00000000  | -0.52815534 | -2.83087100 |
| C                                   | -0.54753530 | -0.89858549 | -3.56851500 | C1                                  | 0.00000000  | 2.67184466  | 0.00000000  |
| H                                   | -0.49462685 | -0.65238585 | -4.62786600 |                                     |             |             |             |
| H                                   | -1.39168815 | -1.57584521 | -3.42760100 |                                     |             |             |             |
| H                                   | 0.37165421  | -1.42528472 | -3.27858900 | 15                                  |             |             |             |
| C                                   | -0.54753530 | -0.89858549 | 3.56851500  | <b>C1<sup>13</sup>C6H4 (NO) 2</b>   |             |             |             |
| H                                   | -1.39168815 | -1.57584521 | 3.42760100  | C                                   | -0.61576437 | -0.22344954 | -1.36715600 |
| H                                   | -0.49462685 | -0.65238585 | 4.62786600  | C                                   | -0.49373143 | -1.43503235 | -0.69622000 |
| H                                   | 0.37165421  | -1.42528472 | 3.27858900  | C                                   | -0.73873834 | 0.99747600  | -0.69129000 |
| C1                                  | 2.91976823  | 0.00797556  | 0.00000000  | C                                   | -0.61576437 | -0.22344954 | 1.36715600  |
|                                     |             |             |             | C                                   | -0.73873834 | 0.99747600  | 0.69129000  |
|                                     |             |             |             | C                                   | -0.49373143 | -1.43503235 | 0.69622000  |
|                                     |             |             |             | H                                   | -0.83084382 | 1.91192919  | -1.26179100 |
| 19                                  |             |             |             | H                                   | -0.40183981 | -2.34736228 | -1.27173200 |
| <b>C1<sup>13</sup>C6H4 (NHOH) 2</b> |             |             |             | H                                   | -0.83084382 | 1.91192919  | 1.26179100  |
| C                                   | -0.57761835 | 1.47278236  | 0.69282800  | H                                   | -0.40183981 | -2.34736228 | 1.27173200  |
| C                                   | -0.79023752 | -0.92415799 | -0.69822700 | N                                   | -0.60532810 | -0.32706428 | 2.81119700  |
| C                                   | -0.57761835 | 1.47278236  | -0.69282800 | O                                   | -0.71123527 | 0.72441659  | 3.38558100  |
| C                                   | -0.68328793 | 0.27047563  | 1.40062400  | N                                   | -0.60532810 | -0.32706428 | -2.81119700 |
| C                                   | -0.79023752 | -0.92415799 | 0.69822700  | O                                   | -0.71123527 | 0.72441659  | -3.38558100 |
| C                                   | -0.68328793 | 0.27047563  | -1.40062400 | C1                                  | 2.61756086  | 0.10536302  | 0.00000000  |
| H                                   | -0.51096722 | 2.41203582  | -1.23117100 |                                     |             |             |             |
| H                                   | -0.51096722 | 2.41203582  | 1.23117100  | 21                                  |             |             |             |
| H                                   | -0.85392250 | -1.85679566 | 1.24003900  | <b>C1<sup>13</sup>C6H4 (OCF3) 2</b> |             |             |             |
| H                                   | -0.85392250 | -1.85679566 | -1.24003900 | C                                   | -0.18887438 | 0.68420857  | -1.37739900 |
| N                                   | -0.74457854 | 0.33789583  | -2.81979900 | C                                   | 0.20954389  | 1.82695364  | -0.69268700 |
| H                                   | -0.01416716 | 0.94504692  | -3.17391400 | C                                   | -0.58683933 | -0.45723625 | -0.69804200 |
| N                                   | -0.74457854 | 0.33789583  | 2.81979900  | C                                   | -0.18887438 | 0.68420857  | 1.37739900  |
| H                                   | -0.01416716 | 0.94504692  | 3.17391400  | C                                   | -0.58683933 | -0.45723625 | 0.69804200  |
| O                                   | -0.50469410 | -0.91801698 | -3.41391300 | C                                   | 0.20954389  | 1.82695364  | 0.69268700  |
| H                                   | -1.30988298 | -1.09060623 | -3.91745000 | H                                   | -0.89769900 | -1.34884534 | -1.22072200 |
| O                                   | -0.50469410 | -0.91801698 | 3.41391300  | H                                   | 0.51392133  | 2.69997034  | -1.25378100 |
| H                                   | -1.30988298 | -1.09060623 | 3.91745000  | H                                   | -0.89769900 | -1.34884534 | 1.22072200  |
| C1                                  | 2.85240062  | -0.04063715 | 0.00000000  | H                                   | 0.51392133  | 2.69997034  | 1.25378100  |
|                                     |             |             |             | C                                   | -0.50209255 | -0.21416516 | -3.56330900 |
| 17                                  |             |             |             | C                                   | -0.50209255 | -0.21416516 | 3.56330900  |
| <b>C1<sup>13</sup>C6H4 (NO2) 2</b>  |             |             |             | O                                   | -0.14540783 | 0.80887952  | -2.76658500 |
| C                                   | 1.22142200  | -0.52815534 | -0.69475700 | O                                   | -0.14540783 | 0.80887952  | 2.76658500  |
| C                                   | 1.22142200  | -0.52815534 | 0.69475700  | F                                   | -1.77898672 | -0.59285061 | -3.37665100 |
| C                                   | -1.22142200 | -0.52815534 | 0.69475700  | F                                   | 0.26257777  | -1.30464244 | -3.37665100 |
| C                                   | -1.22142200 | -0.52815534 | -0.69475700 | F                                   | -0.36421249 | 0.18130303  | -4.82390900 |
| C                                   | 0.00000000  | -0.52815534 | -1.35543700 | F                                   | 0.26257777  | -1.30464244 | 3.37665100  |
| C                                   | 0.00000000  | -0.52815534 | 1.35543700  | F                                   | -1.77898672 | -0.59285061 | 3.37665100  |
| H                                   | 2.14186600  | -0.52815534 | -1.25956200 | F                                   | -0.36421249 | 0.18130303  | 4.82390900  |
| H                                   | 2.14186600  | -0.52815534 | 1.25956200  | C1                                  | 2.92731852  | -0.40176656 | 0.00000000  |
| H                                   | -2.14186600 | -0.52815534 | 1.25956200  |                                     |             |             |             |
| H                                   | -2.14186600 | -0.52815534 | -1.25956200 |                                     |             |             |             |

15  
**Cl<sup>-</sup>-C6H4 (OH) 2**

|    |             |             |             |
|----|-------------|-------------|-------------|
| C  | -0.80467636 | 0.00618668  | -1.39434200 |
| C  | -0.80467636 | 0.00618668  | 1.39434200  |
| C  | -0.80295180 | -1.19660908 | -0.69798900 |
| C  | -0.80295180 | -1.19660908 | 0.69798900  |
| C  | -0.80640531 | 1.21203944  | 0.69364700  |
| C  | -0.80640531 | 1.21203944  | -0.69364700 |
| H  | -0.80159923 | -2.13996511 | -1.23383400 |
| H  | -0.80159923 | -2.13996511 | 1.23383400  |
| H  | -0.80773551 | 2.13979049  | 1.25088900  |
| H  | -0.80773551 | 2.13979049  | -1.25088900 |
| O  | -0.80477199 | 0.07288061  | -2.76374400 |
| O  | -0.80477199 | 0.07288061  | 2.76374400  |
| H  | -0.80349596 | -0.81708547 | -3.13548600 |
| H  | -0.80349596 | -0.81708547 | 3.13548600  |
| Cl | 2.74531853  | 0.01229564  | 0.00000000  |

21  
**Cl<sup>-</sup>-C6H4 (OMe) 2**

|    |             |             |             |
|----|-------------|-------------|-------------|
| C  | -0.64939578 | 0.27744559  | -1.39967100 |
| C  | -0.76183918 | -0.91778290 | -0.70150500 |
| C  | -0.76183918 | -0.91778290 | 0.70150500  |
| C  | -0.64939578 | 0.27744559  | 1.39967100  |
| C  | -0.53619699 | 1.48070362  | 0.69048800  |
| C  | -0.53619699 | 1.48070362  | -0.69048800 |
| H  | -0.85080558 | -1.86346028 | -1.21718000 |
| H  | -0.85080558 | -1.86346028 | 1.21718000  |
| H  | -0.44939243 | 2.40340146  | 1.24958100  |
| H  | -0.44939243 | 2.40340146  | -1.24958100 |
| O  | -0.63920999 | 0.38571652  | 2.76183400  |
| O  | -0.63920999 | 0.38571652  | -2.76183400 |
| C  | -0.75177206 | -0.81077340 | 3.50781800  |
| C  | -0.75177206 | -0.81077340 | -3.50781800 |
| H  | -1.69713328 | -1.31734665 | 3.29528200  |
| H  | -1.69713328 | -1.31734665 | -3.29528200 |
| H  | 0.08252467  | -1.48477136 | 3.29528200  |
| H  | 0.08252467  | -1.48477136 | -3.29528200 |
| H  | -0.72404537 | -0.51604975 | 4.55323800  |
| H  | -0.72404537 | -0.51604975 | -4.55323800 |
| Cl | 2.93503012  | -0.05706624 | 0.00000000  |

21  
**Cl<sup>-</sup>-C6H4 (SCH3) 2**

|   |             |             |             |
|---|-------------|-------------|-------------|
| C | -0.51035863 | 0.31931364  | -1.40979300 |
| C | -0.66877266 | -0.86706579 | -0.69886500 |
| C | -0.66877266 | -0.86706579 | 0.69886500  |
| C | -0.51035863 | 0.31931364  | 1.40979300  |
| C | -0.35083720 | 1.51398646  | 0.69166200  |
| C | -0.35083720 | 1.51398646  | -0.69166200 |

|    |             |             |             |
|----|-------------|-------------|-------------|
| H  | -0.79484593 | -1.81124187 | -1.21124200 |
| H  | -0.79484593 | -1.81124187 | 1.21124200  |
| H  | -0.22600486 | 2.44886902  | 1.22611100  |
| H  | -0.22600486 | 2.44886902  | -1.22611100 |
| S  | -0.49329467 | 0.44710742  | 3.17629700  |
| S  | -0.49329467 | 0.44710742  | -3.17629700 |
| C  | -0.72265076 | -1.27056458 | 3.69385800  |
| C  | -0.72265076 | -1.27056458 | -3.69385800 |
| H  | -1.67825497 | -1.66536202 | 3.34963000  |
| H  | -1.67825497 | -1.66536202 | -3.34963000 |
| H  | 0.09588882  | -1.90225864 | 3.34963000  |
| H  | 0.09588882  | -1.90225864 | -3.34963000 |
| H  | -0.72046125 | -1.25416712 | 4.78284800  |
| H  | -0.72046125 | -1.25416712 | -4.78284800 |
| Cl | 2.90965981  | -0.13453841 | 0.00000000  |

15  
**Cl<sup>-</sup>-C6H4 (SH) 2**

|    |             |             |             |
|----|-------------|-------------|-------------|
| C  | -0.64447854 | -0.00604433 | -1.40427000 |
| C  | -0.64447854 | -0.00604433 | 1.40427000  |
| C  | -0.63570443 | -1.20735829 | -0.69576800 |
| C  | -0.63570443 | -1.20735829 | 0.69576800  |
| C  | -0.65326681 | 1.19720958  | 0.69425900  |
| C  | -0.65326681 | 1.19720958  | -0.69425900 |
| H  | -0.62878572 | -2.15463902 | -1.22180300 |
| H  | -0.62878572 | -2.15463902 | 1.22180300  |
| H  | -0.66015667 | 2.14054042  | 1.22721600  |
| H  | -0.66015667 | 2.14054042  | -1.22721600 |
| S  | -0.64506737 | 0.07457652  | -3.17698300 |
| S  | -0.64506737 | 0.07457652  | 3.17698300  |
| H  | -0.63539104 | -1.25026714 | -3.38421000 |
| H  | -0.63539104 | -1.25026714 | 3.38421000  |
| Cl | 2.80542472  | 0.01979995  | 0.00000000  |

19  
**Cl<sup>-</sup>-C6H4 (SiF3) 2**

|    |             |             |             |
|----|-------------|-------------|-------------|
| C  | 0.39530906  | -0.00013622 | 1.40247020  |
| C  | 0.38774826  | -1.20901951 | 0.69554840  |
| C  | 0.38831685  | 1.20879266  | 0.69553320  |
| C  | 0.39530906  | -0.00013622 | -1.40247020 |
| C  | 0.38831685  | 1.20879266  | -0.69553320 |
| C  | 0.38774826  | -1.20901951 | -0.69554840 |
| Si | 0.41151006  | 0.00005093  | 3.23989000  |
| F  | 1.88500065  | 0.00877281  | 3.85136460  |
| F  | -0.31272290 | -1.30292406 | 3.80698190  |
| F  | -0.32792126 | 1.29432102  | 3.80733720  |
| H  | 0.37169140  | 2.15281400  | 1.22754860  |
| H  | 0.37082071  | -2.15296407 | 1.22760460  |



|    |             |             |             |
|----|-------------|-------------|-------------|
| Si | 0.41151006  | 0.00005093  | -3.23989000 |
| F  | 1.88500065  | 0.00877281  | -3.85136460 |
| F  | -0.32792126 | 1.29432102  | -3.80733720 |
| F  | -0.31272290 | -1.30292406 | -3.80698190 |
| H  | 0.37169140  | 2.15281400  | -1.22754860 |
| H  | 0.37082071  | -2.15296407 | -1.22760460 |
| Cl | -2.90954194 | 0.00001030  | 0.00000000  |

19

**Cl<sup>-</sup>C6H4 (SiH3) 2**

|    |             |             |             |
|----|-------------|-------------|-------------|
| C  | 1.41691950  | 0.00000000  | -0.65362403 |
| C  | 0.69639075  | -1.20091275 | -0.65821103 |
| C  | 0.69639075  | 1.20091275  | -0.65821103 |
| C  | -1.41691950 | 0.00000000  | -0.65362403 |
| C  | -0.69639075 | 1.20091275  | -0.65821103 |
| C  | -0.69639075 | -1.20091275 | -0.65821103 |
| H  | 1.22330000  | -2.14946725 | -0.66990128 |
| H  | -1.22330000 | -2.14946725 | -0.66990128 |
| H  | -1.22330000 | 2.14946725  | -0.66990128 |
| H  | 1.22330000  | 2.14946725  | -0.66990128 |
| Si | 3.29416350  | 0.00000000  | -0.62399703 |
| Si | -3.29416350 | 0.00000000  | -0.62399703 |
| H  | 3.81061200  | 0.00000000  | 0.77281197  |
| H  | 3.80275550  | -1.21872075 | -1.30998853 |
| H  | 3.80275550  | 1.21872075  | -1.30998853 |
| H  | -3.81061200 | 0.00000000  | 0.77281197  |
| H  | -3.80275550 | -1.21872075 | -1.30998853 |
| H  | -3.80275550 | 1.21872075  | -1.30998853 |
| Cl | 0.00000000  | 0.00000000  | 2.79331797  |

19  
**Cl<sup>-</sup>C6H3 (BF2) 3**

|    |             |             |             |
|----|-------------|-------------|-------------|
| C  | -0.00455139 | 1.38948822  | -0.44199916 |
| C  | -1.22311812 | 0.70085205  | -0.44199949 |
| C  | -1.20105640 | -0.69868573 | -0.44199916 |
| C  | 0.00460338  | -1.40967739 | -0.44199949 |
| C  | 1.20560780  | -0.69080249 | -0.44199916 |
| C  | 1.21851474  | 0.70882534  | -0.44199949 |
| H  | -0.00808890 | 2.47404401  | -0.44199982 |
| H  | 2.14662941  | -1.23001681 | -0.44199982 |
| B  | 2.55825626  | 1.48817243  | -0.44200049 |
| H  | -2.13854051 | -1.24402719 | -0.44199982 |
| B  | -2.56792326 | 1.47142870  | -0.44200049 |
| B  | 0.00966700  | -2.95960113 | -0.44200049 |
| F  | 2.58371346  | 2.81759081  | -0.44200149 |
| F  | 3.72646778  | 0.85312610  | -0.44199949 |
| F  | 1.14824849  | -3.64635690 | -0.44200149 |
| F  | -1.12440502 | -3.65377882 | -0.44199949 |
| F  | -3.73196195 | 0.82876608  | -0.44200149 |
| F  | -2.60206277 | 2.80065272  | -0.44199949 |
| Cl | 0.00000000  | 0.00000000  | 2.80800051  |

19  
**Cl<sup>-</sup>C6H3 (CCH) 3**

|    |             |             |             |
|----|-------------|-------------|-------------|
| C  | 0.98825128  | 0.98825128  | 0.59052632  |
| C  | 1.35097037  | -0.36199142 | 0.59052632  |
| C  | 0.36172507  | -1.34997635 | 0.59052632  |
| C  | -0.98897895 | -0.98897895 | 0.59052632  |
| C  | -1.34997635 | 0.36172507  | 0.59052632  |
| C  | -0.36199142 | 1.35097037  | 0.59052632  |
| H  | 1.75283043  | 1.75283043  | 0.59052632  |
| H  | -2.39441090 | 0.64158047  | 0.59052632  |
| H  | 0.64158047  | -2.39441090 | 0.59052632  |
| C  | -0.73348541 | 2.73740481  | 0.59052632  |
| C  | -1.04588781 | 3.90330646  | 0.59052632  |
| H  | -1.32171395 | 4.93270363  | 0.59052632  |
| C  | 2.73740481  | -0.73348541 | 0.59052632  |
| C  | 3.90330646  | -1.04588781 | 0.59052632  |
| H  | 4.93270363  | -1.32171395 | 0.59052632  |
| C  | -2.00391940 | -2.00391940 | 0.59052632  |
| C  | -2.85741864 | -2.85741864 | 0.59052632  |
| H  | -3.61098967 | -3.61098967 | 0.59052632  |
| Cl | 0.00000000  | 0.00000000  | -2.70947368 |

22  
**Cl<sup>-</sup>C6H3 (CF3) 3**

|   |             |             |             |
|---|-------------|-------------|-------------|
| C | -1.12487391 | 0.82894635  | -0.31478587 |
| C | -1.26807203 | -0.55433956 | -0.31484487 |
| C | -0.15545164 | -1.38864256 | -0.31478587 |
| C | 1.11410816  | -0.82101281 | -0.31484487 |

|    |             |             |             |
|----|-------------|-------------|-------------|
| C  | 1.28032555  | 0.55969621  | -0.31478587 |
| C  | 0.15396387  | 1.37535237  | -0.31484487 |
| H  | -1.99573694 | 1.47070624  | -0.30043721 |
| H  | 2.27153743  | 0.99300577  | -0.30043721 |
| H  | -0.27580049 | -2.46371201 | -0.30043721 |
| C  | 0.32115352  | 2.86885011  | -0.35530221 |
| C  | 2.32392031  | -1.71255216 | -0.35530221 |
| C  | -2.64507383 | -1.15629794 | -0.35530221 |
| F  | 0.37184825  | 3.32170236  | -1.62366454 |
| F  | 1.45745856  | 3.25802385  | 0.24853546  |
| F  | -0.70097028 | 3.49964924  | 0.24853513  |
| F  | 3.38127029  | -1.14276655 | 0.24853513  |
| F  | 2.69075450  | -1.98288121 | -1.62366454 |
| F  | 2.09280215  | -2.89120806 | 0.24853546  |
| F  | -3.06260275 | -1.33882115 | -1.62366454 |
| F  | -2.68030001 | -2.35688269 | 0.24853513  |
| F  | -3.55026070 | -0.36681579 | 0.24853546  |
| Cl | 0.00000000  | 0.00000000  | 2.88518479  |

25  
**Cl<sup>-</sup>C6H3 (CH2OH) 3**

|    |             |             |             |
|----|-------------|-------------|-------------|
| C  | -0.78591301 | -1.14931863 | -0.56401869 |
| C  | 0.61049624  | -1.25416155 | -0.56401869 |
| C  | 1.38829563  | -0.10596132 | -0.56401869 |
| C  | 0.78088764  | 1.15578603  | -0.56401869 |
| C  | -0.60238262 | 1.25527995  | -0.56401869 |
| C  | -1.39138388 | 0.09837552  | -0.56401869 |
| H  | -1.40580653 | -2.03771969 | -0.56401869 |
| H  | -1.06181375 | 2.23632401  | -0.56401869 |
| H  | 2.46762028  | -0.19860432 | -0.56401869 |
| C  | -2.89201822 | 0.24848572  | -0.56401869 |
| C  | 1.66120405  | 2.38031839  | -0.56401869 |
| C  | 1.23081417  | -2.62880410 | -0.56401869 |
| H  | -3.19527692 | 0.81525084  | 0.32262331  |
| H  | -3.19527692 | 0.81525084  | -1.45066069 |
| H  | 0.89161052  | -3.17481641 | -1.45066069 |
| H  | 0.89161052  | -3.17481641 | 0.32262331  |
| H  | 2.30366640  | 2.35956556  | -1.45066069 |
| H  | 2.30366640  | 2.35956556  | 0.32262331  |
| O  | 0.85524251  | 3.55066440  | -0.56401869 |
| H  | 1.42766852  | 4.32542995  | -0.56401869 |
| O  | -3.50258683 | -1.03467046 | -0.56401869 |
| H  | -4.45976648 | -0.92631777 | -0.56401869 |
| O  | 2.64734431  | -2.51599394 | -0.56401869 |
| H  | 3.03209796  | -3.39911218 | -0.56401869 |
| Cl | 0.00000000  | 0.00000000  | 2.98598131  |

22  
**C1<sup>13</sup>C6H3 (CH3) 3**

|    |             |             |             |
|----|-------------|-------------|-------------|
| C  | -1.27139255 | 0.74641163  | -0.54271155 |
| C  | -0.15917229 | 0.75685774  | -1.38571326 |
| C  | 1.11431947  | 0.75078034  | -0.81476951 |
| C  | 1.28832068  | 0.72515641  | 0.56973875  |
| C  | 0.15710306  | 0.71512684  | 1.38707577  |
| C  | -1.12911865 | 0.72072987  | 0.84541421  |
| H  | -2.26722786 | 0.76506083  | -0.97533250 |
| H  | 0.28014797  | 0.70927187  | 2.46597372  |
| H  | 1.98711074  | 0.77285169  | -1.46048210 |
| C  | -2.34173927 | 0.68312039  | 1.74242844  |
| C  | 2.67189305  | 0.69230097  | 1.17069136  |
| C  | -0.33012578 | 0.75804747  | -2.88480283 |
| H  | -3.19031677 | 1.18779666  | 1.27810202  |
| H  | -2.63963795 | -0.34896600 | 1.94621143  |
| H  | -2.13782014 | 1.16474641  | 2.69994298  |
| H  | -1.25444040 | 1.25990323  | -3.17491426 |
| H  | -0.37213729 | -0.26450802 | -3.26962650 |
| H  | 0.50332009  | 1.26312123  | -3.37536260 |
| H  | 3.39231215  | 1.19985067  | 0.52744260  |
| H  | 3.01175262  | -0.33861693 | 1.30174658  |
| H  | 2.68704828  | 1.17358142  | 2.14973189  |
| C1 | -0.00003751 | -2.81384018 | -0.03750244 |

19  
**C1<sup>13</sup>C6H3 (CHO) 3**

|    |             |             |             |
|----|-------------|-------------|-------------|
| C  | -0.91277244 | -1.05491449 | -0.54702970 |
| C  | -1.36813397 | 0.26992310  | -0.54702970 |
| C  | -0.45719653 | 1.31794137  | -0.54702970 |
| C  | 0.91782725  | 1.04987723  | -0.54702970 |
| C  | 1.36996897  | -0.26302688 | -0.54702970 |
| C  | 0.45030673  | -1.31980033 | -0.54702970 |
| H  | -1.64185477 | -1.85802643 | -0.54702970 |
| H  | 2.43002548  | -0.49287473 | -0.54702970 |
| H  | -0.78817070 | 2.35090116  | -0.54702970 |
| C  | 0.93386732  | -2.72364251 | -0.54702970 |
| O  | 2.10526881  | -3.02527224 | -0.54702970 |
| H  | 0.14752784  | -3.49690948 | -0.54702970 |
| C  | -2.82567727 | 0.55306844  | -0.54702970 |
| O  | -3.67259702 | -0.31058015 | -0.54702970 |
| H  | -3.10217636 | 1.62069188  | -0.54702970 |
| C  | 1.89180995  | 2.17057408  | -0.54702970 |
| O  | 1.56732821  | 3.33585239  | -0.54702970 |
| H  | 2.95464852  | 1.87621760  | -0.54702970 |
| C1 | 0.00000000  | 0.00000000  | 2.70297030  |

16  
**C1<sup>13</sup>C6H3 (CN) 3**

|   |            |            |             |
|---|------------|------------|-------------|
| C | 0.99055066 | 0.99055066 | -0.56368421 |
|---|------------|------------|-------------|

|    |             |             |             |
|----|-------------|-------------|-------------|
| C  | 1.34296369  | -0.35984604 | -0.56368421 |
| C  | 0.36256671  | -1.35311737 | -0.56368421 |
| C  | -0.98311765 | -0.98311765 | -0.56368421 |
| C  | -1.35311737 | 0.36256671  | -0.56368421 |
| C  | -0.35984604 | 1.34296369  | -0.56368421 |
| H  | 1.75533610  | 1.75533610  | -0.56368421 |
| H  | -2.39783371 | 0.64249761  | -0.56368421 |
| H  | 0.64249761  | -2.39783371 | -0.56368421 |
| C  | -0.73230673 | 2.73300591  | -0.56368421 |
| N  | -1.03127213 | 3.84876000  | -0.56368421 |
| C  | 2.73300591  | -0.73230673 | -0.56368421 |
| N  | 3.84876000  | -1.03127213 | -0.56368421 |
| C  | -2.00069919 | -2.00069919 | -0.56368421 |
| N  | -2.81748786 | -2.81748786 | -0.56368421 |
| C1 | 0.00000000  | 0.00000000  | 2.58631579  |

28  
**C1<sup>13</sup>C6H3 (COCH3) 3**

|    |             |             |             |
|----|-------------|-------------|-------------|
| C  | -1.05602769 | -0.90704276 | -0.44200000 |
| C  | -1.31751278 | 0.46856028  | -0.44200000 |
| C  | -0.25750823 | 1.36806818  | -0.44200000 |
| C  | 1.06454150  | 0.90671940  | -0.44200000 |
| C  | 1.31353591  | -0.46102542 | -0.44200000 |
| C  | 0.25297129  | -1.37527968 | -0.44200000 |
| H  | -1.90403607 | -1.57945119 | -0.44200000 |
| H  | 2.31986289  | -0.85921801 | -0.44200000 |
| H  | -0.41582683 | 2.43866920  | -0.44200000 |
| C  | 0.58407766  | -2.83953973 | -0.44200000 |
| O  | 1.74532989  | -3.19938929 | -0.44200000 |
| C  | -2.75115237 | 0.91394378  | -0.44200000 |
| O  | -3.64341735 | 0.08819462  | -0.44200000 |
| C  | 2.16707472  | 1.92559596  | -0.44200000 |
| O  | 1.89808746  | 3.11119467  | -0.44200000 |
| C  | -0.54747061 | -3.83775645 | -0.44200000 |
| H  | -1.17783632 | -3.70495386 | 0.44018800  |
| H  | -1.17783632 | -3.70495386 | -1.32418800 |
| H  | -0.12356934 | -4.83902828 | -0.44200000 |
| C  | -3.04985927 | 2.39300168  | -0.44200000 |
| H  | -2.61966600 | 2.87251311  | 0.44018800  |
| H  | -2.61966600 | 2.87251311  | -1.32418800 |
| H  | -4.12893675 | 2.52652833  | -0.44200000 |
| C  | 3.59732988  | 1.44475477  | -0.44200000 |
| H  | 3.79750232  | 0.83244075  | 0.44018800  |
| H  | 3.79750232  | 0.83244075  | -1.32418800 |
| H  | 4.25250609  | 2.31249995  | -0.44200000 |
| C1 | 0.00000000  | 0.00000000  | 2.80800000  |

31  
**Cl<sup>-</sup>C6H3 (COOCH3) 3**

|    |             |             |             |
|----|-------------|-------------|-------------|
| C  | 0.03092063  | 1.39600476  | -0.37651007 |
| C  | 1.22072569  | 0.66779279  | -0.37651007 |
| C  | 1.19351527  | -0.72478043 | -0.37651007 |
| C  | -0.03203732 | -1.39107585 | -0.37651007 |
| C  | -1.22443590 | -0.67122433 | -0.37651007 |
| C  | -1.18868836 | 0.72328306  | -0.37651007 |
| H  | 0.07107659  | 2.47638042  | -0.37651007 |
| H  | -2.18014665 | -1.17663607 | -0.37651007 |
| H  | 2.10907006  | -1.29974435 | -0.37651007 |
| C  | -2.49167447 | 1.44849486  | -0.37651007 |
| O  | -3.57045771 | 0.89974109  | -0.37651007 |
| O  | -2.34134175 | 2.77935421  | -0.37651007 |
| C  | -0.00859611 | -2.88210082 | -0.37651007 |
| O  | 1.00603022  | -3.54197763 | -0.37651007 |
| O  | -1.23632048 | -3.41733854 | -0.37651007 |
| C  | 2.50027058  | 1.43360596  | -0.37651007 |
| O  | 2.56442750  | 2.64223654  | -0.37651007 |
| O  | 3.57766223  | 0.63798433  | -0.37651007 |
| C  | -3.56539794 | 3.53061522  | -0.37651007 |
| H  | -4.14598445 | 3.29201619  | 0.51224393  |
| H  | -3.26236499 | 4.57247386  | -0.37651007 |
| H  | -4.14598445 | 3.29201619  | -1.26526407 |
| C  | 4.84030144  | 1.32241758  | -0.37651007 |
| H  | 4.92396187  | 1.94451977  | 0.51224393  |
| H  | 5.59106102  | 0.53905403  | -0.37651007 |
| H  | 4.92396187  | 1.94451977  | -1.26526407 |
| C  | -1.27490350 | -4.85303280 | -0.37651007 |
| H  | -2.32869603 | -5.11152789 | -0.37651007 |
| H  | -0.77797742 | -5.23653595 | -1.26526407 |
| H  | -0.77797742 | -5.23653595 | 0.51224393  |
| Cl | 0.00000000  | 0.00000000  | 2.92348993  |

22  
**Cl<sup>-</sup>C6H3 (COOH) 3**

|   |             |             |             |
|---|-------------|-------------|-------------|
| C | -0.35849977 | 1.35026193  | -0.44200000 |
| C | 0.98655884  | 0.97992809  | -0.44200000 |
| C | 1.34861101  | -0.36466105 | -0.44200000 |
| C | 0.35536320  | -1.34434906 | -0.44200000 |
| C | -0.99011124 | -0.98560087 | -0.44200000 |
| C | -1.34192204 | 0.36442097  | -0.44200000 |
| H | -0.62070140 | 2.39942099  | -0.44200000 |
| H | -1.76760883 | -1.73725368 | -0.44200000 |
| H | 2.38831024  | -0.66216731 | -0.44200000 |
| C | -2.79118900 | 0.70222669  | -0.44200000 |
| O | -3.68202890 | -0.11384182 | -0.44200000 |
| O | -3.01953428 | 2.02908110  | -0.44200000 |
| H | -3.98256677 | 2.15347373  | -0.44200000 |
| C | 0.78744834  | -2.76835393 | -0.44200000 |

|    |             |             |             |
|----|-------------|-------------|-------------|
| O  | 1.93960436  | -3.13180966 | -0.44200000 |
| O  | -0.24746864 | -3.62953394 | -0.44200000 |
| H  | 0.12632043  | -4.52574086 | -0.44200000 |
| C  | 2.00374066  | 2.06612724  | -0.44200000 |
| O  | 1.74242455  | 3.24565148  | -0.44200000 |
| O  | 3.26700292  | 1.60045284  | -0.44200000 |
| H  | 3.85624634  | 2.37226713  | -0.44200000 |
| Cl | 0.00000000  | 0.00000000  | 2.80800000  |

13  
**Cl<sup>-</sup>C6H3F3**

|    |             |             |             |
|----|-------------|-------------|-------------|
| C  | -0.99700358 | -0.99700358 | 0.68614458  |
| C  | 0.35205860  | -1.31390057 | 0.68614458  |
| C  | 1.36193221  | -0.36492864 | 0.68614458  |
| C  | 0.96184198  | 0.96184198  | 0.68614458  |
| C  | -0.36492864 | 1.36193221  | 0.68614458  |
| C  | -1.31390057 | 0.35205860  | 0.68614458  |
| H  | -1.76071067 | -1.76071067 | 0.68614458  |
| H  | -0.64446483 | 2.40517551  | 0.68614458  |
| H  | 2.40517551  | -0.64446483 | 0.68614458  |
| F  | -2.61376852 | 0.70035716  | 0.68614458  |
| F  | 0.70035716  | -2.61376852 | 0.68614458  |
| F  | 1.91341136  | 1.91341136  | 0.68614458  |
| Cl | 0.00000000  | 0.00000000  | -2.66385542 |

37  
**Cl<sup>-</sup>C6H3 (NCH3\_2) 3**

|   |             |             |             |
|---|-------------|-------------|-------------|
| C | -1.28620898 | -0.54734727 | 0.60693055  |
| C | -0.16116635 | -1.38705432 | 0.62499534  |
| C | 1.12556325  | -0.82560078 | 0.60917480  |
| C | 1.29035337  | 0.56867363  | 0.60914425  |
| C | 0.16065945  | 1.40211359  | 0.59113047  |
| C | -1.12917195 | 0.84782127  | 0.60689282  |
| H | -2.27247292 | -0.97462788 | 0.59534509  |
| H | 0.28384928  | 2.46967295  | 0.56742927  |
| H | 1.98863782  | -1.46624470 | 0.59931064  |
| N | -2.24765898 | 1.67809312  | 0.62448943  |
| N | -0.52081166 | -2.77050107 | 0.66052282  |
| N | 2.56848579  | 1.12243930  | 0.62897148  |
| C | -3.53625533 | 1.09734915  | 0.30351907  |
| H | -4.29114896 | 1.88061288  | 0.33402131  |
| H | -3.81505858 | 0.34599769  | 1.04377933  |
| H | -3.55266285 | 0.63049880  | -0.69087413 |
| C | 0.82415467  | -3.60000664 | 0.34155821  |
| H | 0.52351130  | -4.64492584 | 0.38686990  |
| H | 1.61942208  | -3.45685371 | 1.07456717  |
| H | 1.22966593  | -3.39291662 | -0.65829743 |
| C | 2.71211219  | 2.52477306  | 0.29192985  |
| H | 3.76764858  | 2.78732511  | 0.32664289  |
| H | 2.19565602  | 3.15081567  | 1.02103131  |

|    |             |             |             |
|----|-------------|-------------|-------------|
| H  | 2.32299507  | 2.76027412  | -0.70815326 |
| C  | -2.06756029 | 3.07621842  | 0.28748101  |
| H  | -1.63320368 | 3.21671197  | -0.71183484 |
| H  | -1.42345373 | 3.56836281  | 1.01766291  |
| H  | -3.03564115 | 3.57224050  | 0.32031167  |
| C  | -1.62400040 | -3.31755497 | 0.33927995  |
| H  | -1.96986389 | -3.02377634 | -0.66127534 |
| H  | -2.36712218 | -2.99691453 | 1.07085719  |
| H  | -1.56928348 | -4.40347350 | 0.38492200  |
| C  | 3.69157182  | 0.26345304  | 0.31024617  |
| H  | 3.60306572  | -0.19507932 | -0.68421464 |
| H  | 3.79059583  | -0.53148955 | 1.05085771  |
| H  | 4.60493594  | 0.85424423  | 0.34230045  |
| C1 | -0.00002864 | -0.05751196 | -3.09134355 |

19  
**C1<sup>13</sup>C6H3 (NH2) 3**

|    |             |             |             |
|----|-------------|-------------|-------------|
| C  | 0.04070620  | 0.77634244  | -1.39796769 |
| C  | -1.18747029 | 0.77648928  | -0.73149017 |
| C  | -1.23192485 | 0.77264552  | 0.66517889  |
| C  | -0.04065167 | 0.77280496  | 1.39557461  |
| C  | 1.19113112  | 0.77264586  | 0.73573488  |
| C  | 1.22803521  | 0.77649158  | -0.66113107 |
| H  | 0.07224961  | 0.80352077  | -2.48167619 |
| H  | 2.11391694  | 0.79696117  | 1.30497475  |
| H  | -2.18625803 | 0.79695877  | 1.17978141  |
| N  | 2.45593084  | 0.83311228  | -1.32325606 |
| H  | 2.44606858  | 0.48027128  | -2.26748772 |
| H  | 3.23902680  | 0.47761596  | -0.79740591 |
| N  | -2.37492591 | 0.83310829  | -1.46367164 |
| H  | -3.18715667 | 0.47771866  | -0.98393477 |
| H  | -2.31050492 | 0.48015829  | -2.40569703 |
| N  | -0.08110029 | 0.82573902  | 2.79017328  |
| H  | 0.74104683  | 0.47046516  | 3.25279670  |
| H  | -0.92856311 | 0.47035486  | 3.20447572  |
| C1 | 0.00011101  | -2.97542705 | -0.00376133 |

28  
**C1<sup>13</sup>C6H3 (NHCH3) 3**

|   |             |             |             |
|---|-------------|-------------|-------------|
| C | -1.28865838 | -0.54315659 | 0.66990728  |
| C | -0.15387604 | -1.37967511 | 0.68468706  |
| C | 1.12362629  | -0.82902206 | 0.67296383  |
| C | 1.28077741  | 0.57202367  | 0.66361650  |
| C | 0.16506438  | 1.40288934  | 0.64889656  |
| C | -1.12686825 | 0.83854897  | 0.66076932  |
| H | -2.27299715 | -0.99186010 | 0.69170708  |
| H | 0.26846423  | 2.47992770  | 0.65422595  |
| H | 2.00456569  | -1.45680897 | 0.69667437  |
| N | -2.21905909 | 1.69676191  | 0.68865429  |
| H | -2.01996419 | 2.61707482  | 0.33268143  |
| N | -0.35071096 | -2.75399047 | 0.73664620  |
| H | -1.25055849 | -3.04733183 | 0.39377864  |
| N | 2.56980388  | 1.08932742  | 0.69515240  |
| H | 3.27054411  | 0.45115717  | 0.35598740  |
| C | -3.54824880 | 1.20583165  | 0.39556623  |
| H | -4.23113744 | 2.05353217  | 0.35901276  |
| H | -3.88828685 | 0.53984798  | 1.19108455  |
| H | -3.60065524 | 0.66425333  | -0.55797259 |
| C | 0.73627422  | -3.66439506 | 0.44805647  |
| H | 0.34328842  | -4.68005455 | 0.43160072  |
| H | 1.49046283  | -3.61312165 | 1.23582531  |
| H | 1.22254653  | -3.45450257 | -0.51359414 |
| C | 2.81199838  | 2.48100695  | 0.38173734  |
| H | 3.88787106  | 2.64807714  | 0.35250727  |
| H | 2.39787356  | 3.12122602  | 1.16316709  |

|    |             |             |             |
|----|-------------|-------------|-------------|
| H  | 2.37809964  | 2.78164737  | -0.58088109 |
| C1 | -0.00005228 | -0.04953333 | -3.08271638 |

22  
**C1<sup>13</sup>C6H3 (NHOH) 3**

|    |             |             |             |
|----|-------------|-------------|-------------|
| C  | -0.64062109 | 1.24888811  | -0.62045507 |
| C  | -1.38318406 | 0.05890300  | -0.61999307 |
| C  | -0.76125828 | -1.17923819 | -0.62045507 |
| C  | 0.64058054  | -1.22732403 | -0.61999307 |
| C  | 1.40187937  | -0.06964992 | -0.62045507 |
| C  | 0.74260352  | 1.16842104  | -0.61999307 |
| H  | -1.13182797 | 2.21154630  | -0.61530674 |
| H  | 2.48116926  | -0.12558138 | -0.61530674 |
| H  | -1.34934130 | -2.08596492 | -0.61530674 |
| N  | 1.55479606  | 2.32407589  | -0.68196140 |
| H  | 2.34421824  | 2.24239605  | -0.05197474 |
| N  | -2.79010679 | 0.18445494  | -0.68196140 |
| H  | -3.11408106 | 0.90895452  | -0.05197474 |
| N  | 1.23531073  | -2.50853083 | -0.68196140 |
| H  | 0.76986283  | -3.15135057 | -0.05197474 |
| O  | 0.86677786  | 3.48924181  | -0.29513474 |
| H  | 0.91959406  | 4.05727686  | -1.07394873 |
| O  | -3.45516098 | -0.99396926 | -0.29513474 |
| H  | -3.97350186 | -1.23224661 | -1.07394873 |
| O  | 2.58838311  | -2.49527255 | -0.29513474 |
| H  | 3.05390780  | -2.82503025 | -1.07394873 |
| C1 | 0.00000000  | 0.00000000  | 2.87977532  |

19  
**C1<sup>13</sup>C6H3 (NO2) 3**

|    |             |             |             |
|----|-------------|-------------|-------------|
| C  | 0.99514679  | 0.99514679  | -0.42160000 |
| C  | -0.35319659 | 1.31814764  | -0.42160000 |
| C  | -1.35939579 | 0.36424901  | -0.42160000 |
| C  | -0.96495104 | -0.96495104 | -0.42160000 |
| C  | 0.36424901  | -1.35939579 | -0.42160000 |
| C  | 1.31814764  | -0.35319659 | -0.42160000 |
| H  | 1.75904856  | 1.75904856  | -0.42160000 |
| H  | 0.64385646  | -2.40290503 | -0.42160000 |
| H  | -2.40290503 | 0.64385646  | -0.42160000 |
| N  | -2.00806461 | -2.00806461 | -0.42160000 |
| O  | -3.16176896 | -1.63369498 | -0.42160000 |
| O  | -1.63369498 | -3.16176896 | -0.42160000 |
| N  | -0.73500266 | 2.74306726  | -0.42160000 |
| O  | -1.92132475 | 2.99570584  | -0.42160000 |
| O  | 0.16606312  | 3.55501973  | -0.42160000 |
| N  | 2.74306726  | -0.73500266 | -0.42160000 |
| O  | 3.55501973  | 0.16606312  | -0.42160000 |
| O  | 2.99570584  | -1.92132475 | -0.42160000 |
| C1 | 0.00000000  | 0.00000000  | 2.67840000  |

|                                  |             |             |             |
|----------------------------------|-------------|-------------|-------------|
| 16                               |             |             |             |
| <b>Cl<sup>-</sup>C6H3 (NO) 3</b> |             |             |             |
| C                                | 0.17638629  | 1.39204420  | -0.52178218 |
| C                                | -1.10616063 | 0.82928577  | -0.52178218 |
| C                                | -1.29373879 | -0.54326710 | -0.52178218 |
| C                                | -0.16510223 | -1.37260609 | -0.52178218 |
| C                                | 1.11735250  | -0.84877711 | -0.52178218 |
| C                                | 1.27126286  | 0.54332032  | -0.52178218 |
| H                                | 0.31224288  | 2.46619660  | -0.52178218 |
| H                                | 1.97966746  | -1.50350856 | -0.52178218 |
| H                                | -2.29191034 | -0.96268803 | -0.52178218 |
| N                                | -0.24743044 | -2.81955904 | -0.52178218 |
| O                                | -1.36988614 | -3.24699319 | -0.52178218 |
| N                                | 2.56552498  | 1.19549848  | -0.52178218 |
| O                                | 3.49692166  | 0.43714039  | -0.52178218 |
| N                                | -2.31809454 | 1.62406057  | -0.52178218 |
| O                                | -2.12703552 | 2.80985279  | -0.52178218 |
| Cl                               | 0.00000000  | 0.00000000  | 2.57821782  |

|                                    |             |             |             |
|------------------------------------|-------------|-------------|-------------|
| 25                                 |             |             |             |
| <b>Cl<sup>-</sup>C6H3 (OCF3) 3</b> |             |             |             |
| C                                  | 0.32874705  | -1.36742944 | -0.30391061 |
| C                                  | 1.31493371  | -0.38321655 | -0.30391061 |
| C                                  | 1.01985511  | 0.96841801  | -0.30391061 |
| C                                  | -0.32559159 | 1.33037427  | -0.30391061 |
| C                                  | -1.34860215 | 0.39901142  | -0.30391061 |
| C                                  | -0.98934212 | -0.94715772 | -0.30391061 |
| H                                  | 0.62461173  | -2.40462178 | -0.30391061 |
| H                                  | -2.39476941 | 0.66138126  | -0.30391061 |
| H                                  | 1.77015768  | 1.74324052  | -0.30391061 |
| O                                  | -0.52120985 | 2.70404522  | -0.30391061 |
| O                                  | 2.60237678  | -0.90064164 | -0.30391061 |
| O                                  | -2.08116693 | -1.80340358 | -0.30391061 |
| C                                  | -1.76483715 | 3.23145337  | -0.30391061 |
| C                                  | 3.68093928  | -0.08733288 | -0.30391061 |
| C                                  | -1.91610214 | -3.14412049 | -0.30391061 |
| F                                  | 3.72052330  | 0.70765185  | -1.38496061 |
| F                                  | 3.72052330  | 0.70765185  | 0.77713939  |
| F                                  | 4.76360570  | -0.85337877 | -0.30391061 |
| F                                  | -1.24741717 | -3.57589362 | -1.38496061 |
| F                                  | -1.24741717 | -3.57589362 | 0.77713939  |
| F                                  | -3.12085055 | -3.69871417 | -0.30391061 |
| F                                  | -1.64275516 | 4.55209294  | -0.30391061 |
| F                                  | -2.47310613 | 2.86824177  | 0.77713939  |
| F                                  | -2.47310613 | 2.86824177  | -1.38496061 |
| Cl                                 | 0.00000000  | 0.00000000  | 2.89608939  |

|                                  |             |            |             |
|----------------------------------|-------------|------------|-------------|
| 16                               |             |            |             |
| <b>Cl<sup>-</sup>C6H3 (OH) 3</b> |             |            |             |
| C                                | -0.82391826 | 1.13603651 | -0.72710843 |

|    |             |             |             |
|----|-------------|-------------|-------------|
| C  | -1.37325608 | -0.14571912 | -0.72710843 |
| C  | -0.57187735 | -1.28155240 | -0.72710843 |
| C  | 0.81282450  | -1.11641510 | -0.72710843 |
| C  | 1.39579561  | 0.14551589  | -0.72710843 |
| C  | 0.56043159  | 1.26213421  | -0.72710843 |
| H  | -1.48054653 | 1.99687609  | -0.72710843 |
| H  | 2.46961868  | 0.28375286  | -0.72710843 |
| H  | -0.98907215 | -2.28062895 | -0.72710843 |
| O  | 1.56298293  | -2.25486601 | -0.72710843 |
| H  | 2.50083257  | -2.02740434 | -0.72710843 |
| O  | -2.73426272 | -0.22614992 | -0.72710843 |
| H  | -3.00619995 | -1.15208236 | -0.72710843 |
| O  | 1.17127979  | 2.48101593  | -0.72710843 |
| H  | 0.50536738  | 3.17948670  | -0.72710843 |
| Cl | 0.00000000  | 0.00000000  | 2.82289157  |

|                                   |             |             |             |
|-----------------------------------|-------------|-------------|-------------|
| 25                                |             |             |             |
| <b>Cl<sup>-</sup>C6H3 (OMe) 3</b> |             |             |             |
| C                                 | 1.10308441  | 0.87111665  | -0.55607477 |
| C                                 | -0.21085390 | 1.36819525  | -0.55607477 |
| C                                 | -1.30595135 | 0.51974080  | -0.55607477 |
| C                                 | -1.07946490 | -0.86670246 | -0.55607477 |
| C                                 | 0.20286694  | -1.39085744 | -0.55607477 |
| C                                 | 1.29031880  | -0.50149279 | -0.55607477 |
| H                                 | 1.91558842  | 1.58148500  | -0.55607477 |
| H                                 | 0.41181197  | -2.44969073 | -0.55607477 |
| H                                 | -2.32740039 | 0.86820573  | -0.55607477 |
| O                                 | -2.20754980 | -1.62774254 | -0.55607477 |
| O                                 | -0.30589149 | 2.72566548  | -0.55607477 |
| O                                 | 2.51344129  | -1.09792294 | -0.55607477 |
| C                                 | -2.04946588 | -3.03614441 | -0.55607477 |
| H                                 | -1.51586860 | -3.36807778 | -1.44991177 |
| H                                 | -1.51586860 | -3.36807778 | 0.33776223  |
| H                                 | -3.05506571 | -3.44788554 | -0.55607477 |
| C                                 | -1.60464525 | 3.29296172  | -0.55607477 |
| H                                 | -2.15890662 | 2.99681961  | -1.44991177 |
| H                                 | -2.15890662 | 2.99681961  | 0.33776223  |
| H                                 | -1.45842361 | 4.36970729  | -0.55607477 |
| C                                 | 3.65411113  | -0.25681731 | -0.55607477 |
| H                                 | 3.67477522  | 0.37125817  | -1.44991177 |
| H                                 | 3.67477522  | 0.37125817  | 0.33776223  |
| H                                 | 4.51348933  | -0.92182175 | -0.55607477 |
| Cl                                | 0.00000000  | 0.00000000  | 2.94392523  |

|                                    |             |             |             |
|------------------------------------|-------------|-------------|-------------|
| 25                                 |             |             |             |
| <b>Cl<sup>-</sup>C6H3 (SCH3) 3</b> |             |             |             |
| C                                  | -0.64758857 | 1.24010962  | -0.44122137 |
| C                                  | -1.39308933 | 0.04895243  | -0.44122137 |
| C                                  | -0.75017215 | -1.18088297 | -0.44122137 |
| C                                  | 0.65415062  | -1.23092697 | -0.44122137 |

|    |             |             |             |
|----|-------------|-------------|-------------|
| C  | 1.39776072  | -0.05922665 | -0.44122137 |
| C  | 0.73893871  | 1.18197454  | -0.44122137 |
| H  | -1.17340927 | 2.18488911  | -0.44122137 |
| H  | 2.47887411  | -0.07624232 | -0.44122137 |
| H  | -1.30546484 | -2.10864679 | -0.44122137 |
| C  | 3.13635473  | -2.52037836 | -0.44122137 |
| H  | 3.43796365  | -1.97642873 | -1.33571137 |
| H  | 3.43796365  | -1.97642873 | 0.45326863  |
| H  | 3.62101558  | -3.49545571 | -0.44122137 |
| C  | -3.75088906 | -1.45597369 | -0.44122137 |
| H  | -3.43061931 | -1.98914949 | -1.33571137 |
| H  | -3.43061931 | -1.98914949 | 0.45326863  |
| H  | -4.83766124 | -1.38816363 | -0.44122137 |
| C  | 0.61453433  | 3.97635205  | -0.44122137 |
| H  | -0.00734433 | 3.96557822  | -1.33571137 |
| H  | -0.00734433 | 3.96557822  | 0.45326863  |
| H  | 1.21664565  | 4.88361934  | -0.44122137 |
| S  | 1.35934423  | -2.85558440 | -0.44122137 |
| S  | -3.15268074 | 0.25056556  | -0.44122137 |
| S  | 1.79333652  | 2.60501883  | -0.44122137 |
| Cl | 0.00000000  | 0.00000000  | 2.95877863  |

16  
Cl<sup>-</sup>C6H3 (SH) 3

|    |             |             |             |
|----|-------------|-------------|-------------|
| C  | 0.98773758  | -0.98974713 | -0.53224299 |
| C  | 1.34338932  | 0.36075556  | -0.53224299 |
| C  | 0.36327737  | 1.35027940  | -0.53224299 |
| C  | -0.98411814 | 0.98303150  | -0.53224299 |
| C  | -1.35101494 | -0.36053227 | -0.53224299 |
| C  | -0.35927119 | -1.34378706 | -0.53224299 |
| H  | 1.75947439  | -1.75029892 | -0.53224299 |
| H  | -2.39554053 | -0.64860006 | -0.53224299 |
| H  | 0.63606614  | 2.39889898  | -0.53224299 |
| S  | -2.17718576 | 2.29429544  | -0.53224299 |
| S  | 3.07551101  | 0.73835045  | -0.53224299 |
| S  | -0.89832526 | -3.03264590 | -0.53224299 |
| H  | -3.26257309 | 1.50653973  | -0.53224299 |
| H  | 0.32658487  | -3.57874104 | -0.53224299 |
| H  | 2.93598822  | 2.07220132  | -0.53224299 |
| Cl | 0.00000000  | 0.00000000  | 2.81775701  |

22  
Cl<sup>-</sup>C6H3 (SiF3) 3

|   |             |             |            |
|---|-------------|-------------|------------|
| C | 1.28132352  | -0.54081176 | 0.29950265 |
| C | 0.17322731  | -1.39544912 | 0.30377452 |
| C | -1.11009084 | -0.83743910 | 0.29971295 |
| C | -1.29618343 | 0.54952168  | 0.30225721 |
| C | -0.17127065 | 1.38189946  | 0.29800238 |
| C | 1.12291642  | 0.84958323  | 0.30204430 |
| H | 2.28046858  | -0.96348549 | 0.27698989 |

|    |             |             |             |
|----|-------------|-------------|-------------|
| H  | -0.30481208 | 2.45849449  | 0.27431915  |
| H  | -1.97569445 | -1.49141385 | 0.27736360  |
| Si | -2.98998891 | 1.26603466  | 0.30546128  |
| Si | 2.59033597  | 1.95820982  | 0.30497141  |
| Si | 0.39961464  | -3.22057990 | 0.30896241  |
| F  | 3.08106419  | 2.33009854  | 1.77479859  |
| F  | 2.24588446  | 3.32782408  | -0.43246437 |
| F  | 3.81424994  | 1.25187308  | -0.43084426 |
| F  | 1.75846427  | -3.60793340 | -0.42709763 |
| F  | 0.47531175  | -3.82981044 | 1.77954630  |
| F  | -0.82354518 | -3.92820180 | -0.42687151 |
| F  | -4.00436917 | 0.28206343  | -0.43015682 |
| F  | -3.55645078 | 1.50679121  | 1.77538202  |
| F  | -2.99072521 | 2.67828282  | -0.43200406 |
| Cl | 0.00012245  | -0.01162431 | -2.89909189 |

22  
Cl<sup>-</sup>C6H3 (SiH3) 3

|    |             |             |             |
|----|-------------|-------------|-------------|
| C  | 1.27244234  | 0.55662190  | -0.55851350 |
| C  | 0.16200669  | 1.40884697  | -0.54867872 |
| C  | -1.11339897 | 0.83202509  | -0.55700324 |
| C  | -1.29626555 | -0.55578042 | -0.55979895 |
| C  | -0.15898746 | -1.37184248 | -0.56942893 |
| C  | 1.13431532  | -0.83634753 | -0.56133708 |
| H  | 2.26945616  | 0.98846626  | -0.57185733 |
| H  | -0.28357683 | -2.45105638 | -0.59132496 |
| H  | -1.98582192 | 1.47966189  | -0.56916410 |
| H  | 3.77736438  | -1.27687750 | -1.21110621 |
| H  | 3.05178638  | -2.26769382 | 0.86549019  |
| H  | 2.32476355  | -3.23386606 | -1.22218275 |
| H  | 1.64631040  | 3.64401954  | -1.18336216 |
| H  | 0.43581518  | 3.77294384  | 0.89954699  |
| H  | -0.77481863 | 3.92349595  | -1.18182977 |
| H  | -3.97098194 | -0.38247044 | -1.20620156 |
| H  | -3.48762672 | -1.51283511 | 0.86963002  |
| H  | -3.00245413 | -2.61893450 | -1.21881047 |
| Si | -3.01912972 | -1.30206936 | -0.52748978 |
| Si | 2.64188310  | -1.95553204 | -0.53107266 |
| Si | 0.37730012  | 3.27370185  | -0.50158994 |
| Cl | -0.00009642 | -0.02890595 | 2.84069812  |



|                                    |             |             |             |
|------------------------------------|-------------|-------------|-------------|
| 21                                 |             |             |             |
| <b>C1<sup>13</sup>C6H2 (CCH) 4</b> |             |             |             |
| C                                  | -0.70609071 | -1.21629871 | -0.51635514 |
| C                                  | -1.39027996 | 0.00000000  | -0.51635514 |
| C                                  | -0.70609071 | 1.21629871  | -0.51635514 |
| C                                  | 0.70609071  | 1.21629871  | -0.51635514 |
| C                                  | 1.39027996  | 0.00000000  | -0.51635514 |
| C                                  | 0.70609071  | -1.21629871 | -0.51635514 |
| H                                  | -2.47163542 | 0.00000000  | -0.51635514 |
| H                                  | 2.47163542  | 0.00000000  | -0.51635514 |
| C                                  | 1.44175986  | -2.44371057 | -0.51635514 |
| C                                  | 2.07690346  | -3.46994141 | -0.51635514 |
| H                                  | 2.62896654  | -4.38152017 | -0.51635514 |
| C                                  | -1.44175986 | -2.44371057 | -0.51635514 |
| C                                  | -2.07690346 | -3.46994141 | -0.51635514 |
| H                                  | -2.62896654 | -4.38152017 | -0.51635514 |
| C                                  | 1.44175986  | 2.44371057  | -0.51635514 |
| C                                  | 2.07690346  | 3.46994141  | -0.51635514 |
| H                                  | 2.62896654  | 4.38152017  | -0.51635514 |
| C                                  | -1.44175986 | 2.44371057  | -0.51635514 |
| C                                  | -2.07690346 | 3.46994141  | -0.51635514 |
| H                                  | -2.62896654 | 4.38152017  | -0.51635514 |
| C1                                 | 0.00000000  | 0.00000000  | 2.73364486  |

|                                    |             |             |             |
|------------------------------------|-------------|-------------|-------------|
| 25                                 |             |             |             |
| <b>C1<sup>13</sup>C6H2 (CH3) 4</b> |             |             |             |
| C                                  | 1.40984785  | -0.00000478 | -0.66318689 |
| C                                  | 0.68192085  | -1.18994578 | -0.66332089 |
| C                                  | -0.71275015 | -1.21640678 | -0.66304989 |
| C                                  | -1.40984415 | -0.00000478 | -0.66318689 |
| C                                  | -0.68193715 | 1.18993622  | -0.66305289 |
| C                                  | 0.71274385  | 1.21641622  | -0.66332389 |
| H                                  | 1.22200785  | -2.13236378 | -0.66352989 |
| H                                  | -1.22201215 | 2.13236122  | -0.66284489 |
| C                                  | 1.45403685  | 2.52919422  | -0.66332789 |
| H                                  | 0.75663285  | 3.36779022  | -0.66399389 |
| H                                  | 2.09598385  | 2.62436422  | 0.21701411  |
| H                                  | 2.09696285  | 2.62380222  | -1.54301689 |
| C                                  | 2.91727085  | -0.02409378 | -0.66332789 |
| H                                  | 3.32383285  | 0.48161222  | -1.54373989 |
| H                                  | 3.32401485  | 0.48284322  | 0.21629111  |
| H                                  | 3.28823685  | -1.04976378 | -0.66263889 |
| C                                  | -2.91726615 | 0.02410822  | -0.66304489 |
| H                                  | -3.32384515 | -0.48157378 | 0.21736811  |
| H                                  | -3.28822115 | 1.04978122  | -0.66374589 |
| H                                  | -3.32402915 | -0.48282578 | -1.54265289 |
| C                                  | -1.45402115 | -2.52919778 | -0.66304589 |
| H                                  | -2.09695215 | -2.62382478 | 0.21663311  |
| H                                  | -2.09595815 | -2.62439378 | -1.54338789 |
| H                                  | -0.75660915 | -3.36778578 | -0.66237089 |

|                                   |             |             |             |
|-----------------------------------|-------------|-------------|-------------|
| C1                                | -0.00000315 | -0.00000178 | 2.88681311  |
| 17                                |             |             |             |
| <b>C1<sup>13</sup>C6H2 (CN) 4</b> |             |             |             |
| C                                 | -0.70307290 | -1.20599043 | -0.48457944 |
| C                                 | -1.40074847 | 0.00000000  | -0.48457944 |
| C                                 | -0.70307290 | 1.20599043  | -0.48457944 |
| C                                 | 0.70307290  | 1.20599043  | -0.48457944 |
| C                                 | 1.40074847  | 0.00000000  | -0.48457944 |
| C                                 | 0.70307290  | -1.20599043 | -0.48457944 |
| H                                 | -2.48191068 | 0.00000000  | -0.48457944 |
| H                                 | 2.48191068  | 0.00000000  | -0.48457944 |
| C                                 | 1.43287331  | -2.44377297 | -0.48457944 |
| N                                 | 2.03575562  | -3.42872310 | -0.48457944 |
| C                                 | -1.43287331 | -2.44377297 | -0.48457944 |
| N                                 | -2.03575562 | -3.42872310 | -0.48457944 |
| C                                 | -1.43287331 | 2.44377297  | -0.48457944 |
| N                                 | -2.03575562 | 3.42872310  | -0.48457944 |
| C                                 | 1.43287331  | 2.44377297  | -0.48457944 |
| N                                 | 2.03575562  | 3.42872310  | -0.48457944 |
| C1                                | 0.00000000  | 0.00000000  | 2.56542056  |

|                              |             |             |             |
|------------------------------|-------------|-------------|-------------|
| 13                           |             |             |             |
| <b>C1<sup>13</sup>C6H2F4</b> |             |             |             |
| C                            | 1.18973430  | 0.69385715  | -0.60714286 |
| C                            | 0.00000000  | 1.40279465  | -0.60714286 |
| C                            | -1.18973430 | 0.69385715  | -0.60714286 |
| C                            | -1.18973430 | -0.69385715 | -0.60714286 |
| C                            | 0.00000000  | -1.40279465 | -0.60714286 |
| C                            | 1.18973430  | -0.69385715 | -0.60714286 |
| H                            | 0.00000000  | 2.48393286  | -0.60714286 |
| H                            | 0.00000000  | -2.48393286 | -0.60714286 |
| F                            | 2.35996263  | -1.34715714 | -0.60714286 |
| F                            | 2.35996263  | 1.34715714  | -0.60714286 |
| F                            | -2.35996263 | -1.34715714 | -0.60714286 |
| F                            | -2.35996263 | 1.34715714  | -0.60714286 |
| C1                           | 0.00000000  | 0.00000000  | 2.64285714  |

|                                    |             |             |             |
|------------------------------------|-------------|-------------|-------------|
| 21                                 |             |             |             |
| <b>C1<sup>13</sup>C6H2 (NH2) 4</b> |             |             |             |
| C                                  | -0.66231966 | -0.00184628 | 1.38683332  |
| C                                  | -0.66781217 | 1.21298237  | 0.70468389  |
| C                                  | -0.68550078 | 1.21300132  | -0.69574206 |
| C                                  | -0.68335771 | -0.00224098 | -1.37732059 |
| C                                  | -0.67831599 | -1.21707603 | -0.69501373 |
| C                                  | -0.66235691 | -1.21709042 | 0.70535238  |
| H                                  | -0.63611503 | -0.00150689 | 2.47257329  |
| H                                  | -0.70809368 | -0.00280376 | -2.46307271 |
| N                                  | -0.64152409 | -2.46612709 | -1.35484751 |
| H                                  | -1.31494999 | -3.11578090 | -0.96369810 |

|    |             |             |             |
|----|-------------|-------------|-------------|
| H  | -0.78289311 | -2.38490923 | -2.35182606 |
| N  | -0.68953697 | -2.46673349 | 1.36532680  |
| H  | -0.00882789 | -3.10962004 | 0.97543556  |
| H  | -0.54905972 | -2.38366234 | 2.36231768  |
| N  | -0.69817837 | 2.46306062  | 1.36448062  |
| H  | -0.57794545 | 2.37848865  | 2.36396558  |
| H  | -0.00551469 | 3.10153461  | 0.98857383  |
| N  | -0.65624504 | 2.46132687  | -1.35604810 |
| H  | -0.81095374 | 2.38112627  | -2.35106302 |
| H  | -1.32148653 | 3.11267347  | -0.95411944 |
| C1 | 2.92660061  | 0.00925835  | -0.02260168 |

25  
**C1<sup>13</sup>C6 (CCH) 6**

|    |             |             |             |
|----|-------------|-------------|-------------|
| C  | -0.99574297 | -0.99574297 | -0.40877863 |
| C  | -1.36021020 | 0.36446722  | -0.40877863 |
| C  | -0.36446722 | 1.36021020  | -0.40877863 |
| C  | 0.99574297  | 0.99574297  | -0.40877863 |
| C  | 1.36021020  | -0.36446722 | -0.40877863 |
| C  | 0.36446722  | -1.36021020 | -0.40877863 |
| C  | -0.73400063 | 2.73932766  | -0.40877863 |
| C  | -1.04619836 | 3.90446544  | -0.40877863 |
| H  | -1.32200375 | 4.93378517  | -0.40877863 |
| C  | -2.73932766 | 0.73400063  | -0.40877863 |
| C  | -3.90446544 | 1.04619836  | -0.40877863 |
| H  | -4.93378517 | 1.32200375  | -0.40877863 |
| C  | -2.00532703 | -2.00532703 | -0.40877863 |
| C  | -2.85826708 | -2.85826708 | -0.40877863 |
| H  | -3.61178142 | -3.61178142 | -0.40877863 |
| C  | 0.73400063  | -2.73932766 | -0.40877863 |
| C  | 1.04619836  | -3.90446544 | -0.40877863 |
| H  | 1.32200375  | -4.93378517 | -0.40877863 |
| C  | 2.73932766  | -0.73400063 | -0.40877863 |
| C  | 3.90446544  | -1.04619836 | -0.40877863 |
| H  | 4.93378517  | -1.32200375 | -0.40877863 |
| C  | 2.00532703  | 2.00532703  | -0.40877863 |
| C  | 2.85826708  | 2.85826708  | -0.40877863 |
| H  | 3.61178142  | 3.61178142  | -0.40877863 |
| C1 | 0.00000000  | 0.00000000  | 2.74122137  |

31  
**C1<sup>13</sup>C6 (CH3) 6**

|   |             |             |             |
|---|-------------|-------------|-------------|
| C | -0.82830551 | 1.15514358  | -0.50625848 |
| C | 0.56613274  | 1.30724101  | -0.52613794 |
| C | 1.39444117  | 0.17509744  | -0.53820134 |
| C | 0.82831133  | -1.10671493 | -0.60483614 |
| C | -0.56612692 | -1.25881236 | -0.58495667 |
| C | -1.39443535 | -0.12666879 | -0.57289328 |
| C | 1.72148246  | -2.32404883 | -0.72407247 |
| H | 1.23090773  | -3.11797220 | -1.28611262 |
| H | 1.99598132  | -2.73130865 | 0.25545392  |
| H | 2.64367081  | -2.08471308 | -1.25242191 |
| C | 2.89807348  | 0.33564225  | -0.45340810 |
| H | 3.36019702  | 0.41811183  | -1.44351970 |
| H | 3.35583517  | -0.51213730 | 0.05511001  |
| H | 3.16691257  | 1.22733118  | 0.11181911  |
| C | 1.17659548  | 2.69289170  | -0.56051408 |
| H | 0.52325191  | 3.39762767  | -1.07369748 |
| H | 2.12493759  | 2.69141822  | -1.09671388 |
| H | 1.36420834  | 3.08562285  | 0.44509227  |
| C | -1.72147663 | 2.37247748  | -0.38702215 |
| H | -1.99597550 | 2.77973729  | -1.36654854 |

|    |             |             |             |
|----|-------------|-------------|-------------|
| H  | -1.23090191 | 3.16640085  | 0.17501800  |
| H  | -2.64366499 | 2.13314172  | 0.14132729  |
| C  | -2.89806766 | -0.28721360 | -0.65768651 |
| H  | -3.35582935 | 0.56056595  | -1.16620463 |
| H  | -3.36019120 | -0.36968318 | 0.33242508  |
| H  | -3.16690675 | -1.17890254 | -1.22291373 |
| C  | -1.17658966 | -2.64446305 | -0.55058054 |
| H  | -1.36420252 | -3.03719420 | -1.55618689 |
| H  | -2.12493177 | -2.64298957 | -0.01438074 |
| H  | -0.52324609 | -3.34919902 | -0.03739714 |
| C1 | -0.00001541 | -0.12819348 | 2.94113281  |

19  
**C1<sup>13</sup>C6 (CN) 6**

|    |             |             |             |
|----|-------------|-------------|-------------|
| C  | -1.40195600 | 0.00000000  | -0.38282443 |
| C  | -0.70097800 | 1.21413000  | -0.38282443 |
| C  | 0.70097800  | 1.21413000  | -0.38282443 |
| C  | 1.40195600  | 0.00000000  | -0.38282443 |
| C  | 0.70097800  | -1.21413000 | -0.38282443 |
| C  | -0.70097800 | -1.21413000 | -0.38282443 |
| C  | 1.41830700  | 2.45658000  | -0.38282443 |
| N  | 1.99557800  | 3.45644200  | -0.38282443 |
| C  | 2.83661500  | 0.00000000  | -0.38282443 |
| N  | 3.99115500  | 0.00000000  | -0.38282443 |
| C  | 1.41830700  | -2.45658000 | -0.38282443 |
| N  | 1.99557800  | -3.45644200 | -0.38282443 |
| C  | -1.41830700 | -2.45658000 | -0.38282443 |
| N  | -1.99557800 | -3.45644200 | -0.38282443 |
| C  | -2.83661500 | 0.00000000  | -0.38282443 |
| N  | -3.99115500 | 0.00000000  | -0.38282443 |
| C  | -1.41830700 | 2.45658000  | -0.38282443 |
| N  | -1.99557800 | 3.45644200  | -0.38282443 |
| C1 | 0.00000000  | 0.00000000  | 2.56717557  |

13  
**C1<sup>13</sup>C6F6**

|    |             |             |             |
|----|-------------|-------------|-------------|
| C  | -1.38796700 | 0.00000000  | -0.50046729 |
| C  | -0.69398300 | 1.20201400  | -0.50046729 |
| C  | 0.69398300  | 1.20201400  | -0.50046729 |
| C  | 1.38796700  | 0.00000000  | -0.50046729 |
| C  | 0.69398300  | -1.20201400 | -0.50046729 |
| C  | -0.69398300 | -1.20201400 | -0.50046729 |
| F  | 1.35959500  | 2.35488800  | -0.50046729 |
| F  | 2.71919100  | 0.00000000  | -0.50046729 |
| F  | 1.35959500  | -2.35488800 | -0.50046729 |
| F  | -1.35959500 | -2.35488800 | -0.50046729 |
| F  | -2.71919100 | 0.00000000  | -0.50046729 |
| F  | -1.35959500 | 2.35488800  | -0.50046729 |
| C1 | 0.00000000  | 0.00000000  | 2.64953271  |

25

**C1<sup>-</sup>-C6 (NH2) 6**

|    |             |             |             |
|----|-------------|-------------|-------------|
| C  | -0.65935772 | -1.34888475 | 0.00000000  |
| C  | -0.56976385 | -0.65567633 | -1.20760400 |
| C  | -0.53923780 | 0.73929393  | -1.20760400 |
| C  | -0.44964394 | 1.43250235  | 0.00000000  |
| C  | -0.53923780 | 0.73929393  | 1.20760400  |
| C  | -0.56976385 | -0.65567633 | 1.20760400  |
| N  | -0.58068283 | -1.36720331 | 2.43905600  |
| H  | -0.13367225 | -2.27053689 | 2.33349600  |
| H  | -0.05294611 | -0.86718072 | 3.14506350  |
| N  | -0.77092952 | -2.76677641 | 0.00000000  |
| H  | -1.28816708 | -3.08426474 | 0.81156700  |
| H  | -1.28816708 | -3.08426474 | -0.81156700 |
| N  | -0.52831883 | 1.45082092  | -2.43905600 |
| H  | -1.05605555 | 0.95079833  | -3.14506350 |
| H  | -0.97532941 | 2.35415450  | -2.33349600 |
| N  | -0.33807213 | 2.85039402  | 0.00000000  |
| H  | 0.17916542  | 3.16788235  | 0.81156700  |
| H  | 0.17916542  | 3.16788235  | -0.81156700 |
| N  | -0.52831883 | 1.45082092  | 2.43905600  |
| H  | -0.97532941 | 2.35415450  | 2.33349600  |
| H  | -1.05605555 | 0.95079833  | 3.14506350  |
| N  | -0.58068283 | -1.36720331 | -2.43905600 |
| H  | -0.05294611 | -0.86718072 | -3.14506350 |
| H  | -0.13367225 | -2.27053689 | -2.33349600 |
| C1 | 2.93559263  | -0.22134072 | 0.00000000  |
